# Supplementary material for: OpenCustomDB: Integration of Unannotated Open Reading Frames and Genetic Variants to Generate More Comprehensive Customized Protein Databases
Source: PubMed Central journal article supplement — J Proteome Res. 2023 Mar 24;22(5):1492–500. doi: 10.1021/acs.jproteome.3c00054 (PMC10167680; doi:10.1021/acs.jproteome.3c00054), 2023-03-24
Supplement: pr3c00054_si_001.pdf [file pr3c00054_si_001.pdf]

# OpenCustomDB: Integration of unannotated open reading frames and genetic variants to generate more comprehensive customised protein databases

## ***Supporting information***

Noé Guilloy<sup>1,2</sup>, Marie A. Brunet<sup>3</sup>, Sébastien Leblanc<sup>1,2</sup>, Jean-François Jacques<sup>1,2</sup>, Marie-Pierre Hardy<sup>4</sup>, Grégory Ehx<sup>5</sup>, Joël Lanoix<sup>4</sup>, Pierre Thibault<sup>4</sup>, Claude Perreault<sup>4,6</sup>, Xavier Roucou<sup>1, 2\*</sup>

<sup>1</sup>Department of Biochemistry and Functional Genomics, Université de Sherbrooke, Sherbrooke J1E 4K8, Québec, Canada

<sup>2</sup>PROTEO, Quebec Network for Research on Protein Function, Structure, and Engineering

<sup>3</sup>Department of Pediatrics, Université de Sherbrooke, Sherbrooke J1E 4K8, Québec, Canada

<sup>4</sup>Institute for Research in Immunology and Cancer, Université de Montréal, Montreal H3C 3J7, Québec, Canada

<sup>5</sup>Interdisciplinary Cluster for Applied Geno-Proteomics (GIGA-I3), University of Liège, Liège B-4000, Belgium

<sup>6</sup>Department of Medicine, Université de Montréal, Montreal H3C 3J7, QC, Canada

**Supplementary figure 1: Customised protein sequence databases that integrate reference and variant proteins.** For each patient, both the composition (left) and the localisation of predicted coding sequences (right) are shown. OpenCustomDB was run with (green bars) or without (grey

bars) integration of altProts and novel isoforms. The size of the databases with altProts and novel isoforms was limited to a total of 100,000 entries by imposing the corresponding TPM threshold.

**Supplementary Figure 2: Number of genes coding for proteins identified with OpenCustomDB libraries with and without alternative proteins.** For each patient, the number of genes identified using customised protein sequence databases integrating reference and variant proteins with alternative proteins (green) and without (canonical library only, grey). Despite the difference in size between the two databases for each patient, there is a notable overlap in identified genes.

**Supplementary Figure 3: Examples of MS2 spectra assigned to a reference protein with a canonical protein database and reassigned to an alternative protein with a database containing canonical proteins, altProts, and novel isoforms.** MS/MS spectrum confidently mapped to either a peptide unique to the reference protein P46100 (A) or Q96QH2 (B) using a database containing canonical proteins only (bottom spectrum), or to a peptide unique to the novel isoform II\_726022 (A) or IP\_643011 (B) using a database containing canonical proteins, altProts, and novel isoforms (top spectrum). Peaks are represented by their mass over charge ratios ( $m/z$ ) and their intensity relative to the highest (relative intensity). The y ions are colored in red, the b ions in blue and the unannotated peaks appear in grey.

**Supplementary Table 1: list of variant peptides in canonical and alternative proteins.**

S3

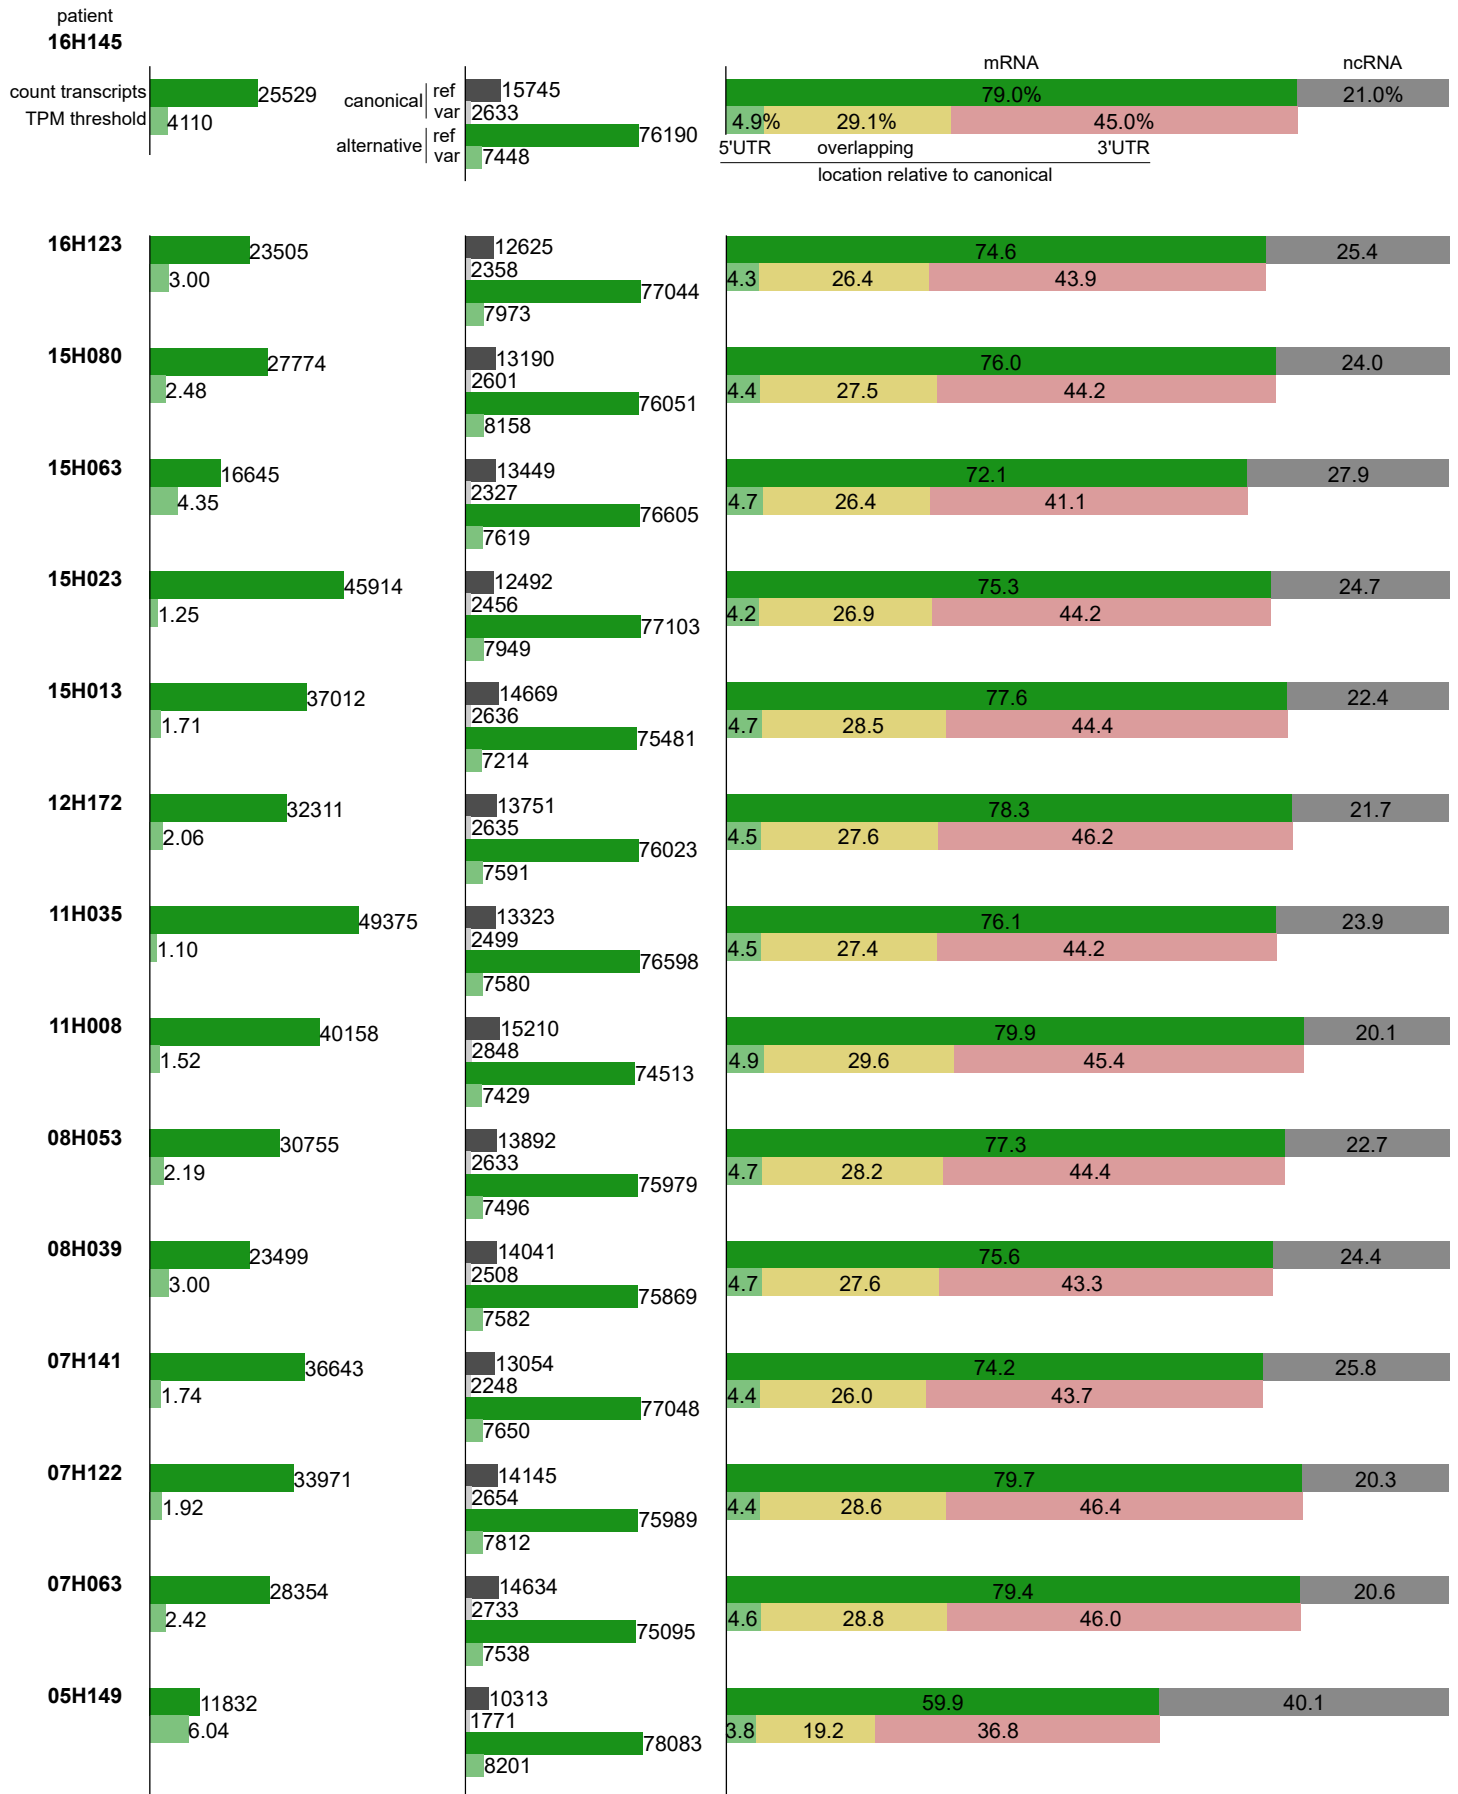

**Supplementary figure 1: Customized protein sequence databases integrating reference and variant proteins.** For each patient, both the composition (left) and the localization of predicted coding sequences (right) are shown. OpenCustomDB was run with (green bars) or without (gray bars) the integration of altProts and novel isoforms. The size of databases with altProts and novel isoforms was limited to a total of 100,000 entries by imposing the corresponding TPM threshold.

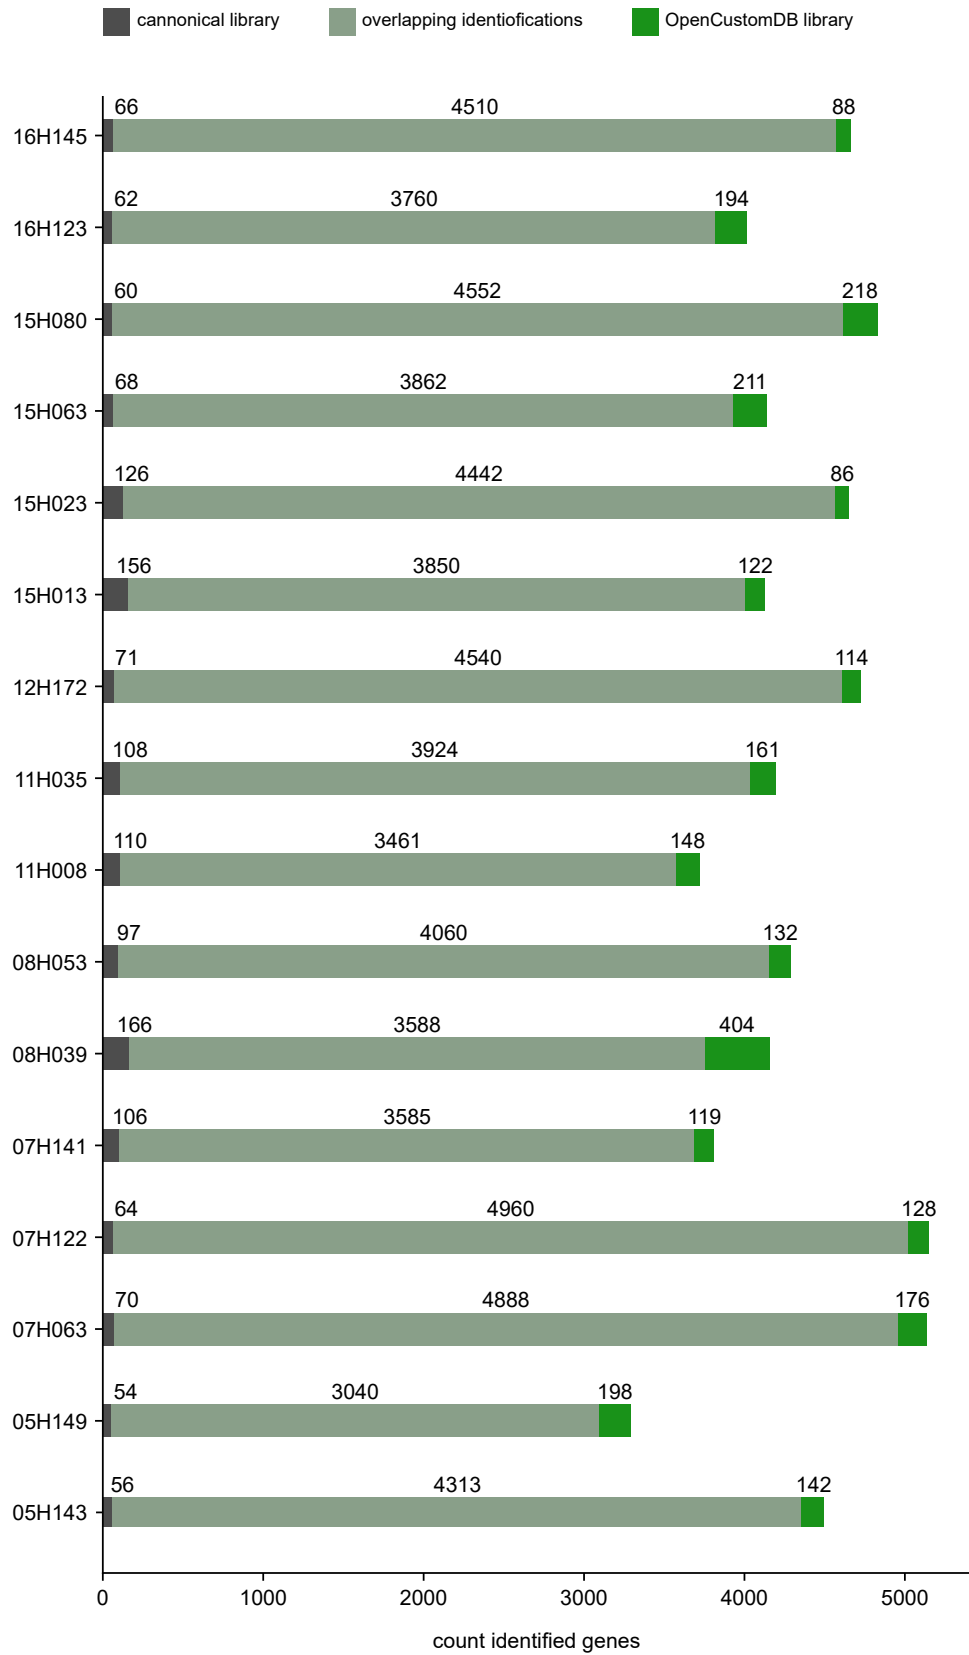

**Supplementary figure 2: Number of genes coding for proteins identified with OpenCustomDB libraries with and without alternative proteins.** For each patient the number of genes identified using customized protein sequence databases integrating reference and variant proteins with alternative proteins (green) and without (canonical only library, gray). Despite the difference in size between the two databases for each patient, there is a remarkable overlap in identified genes.

A.

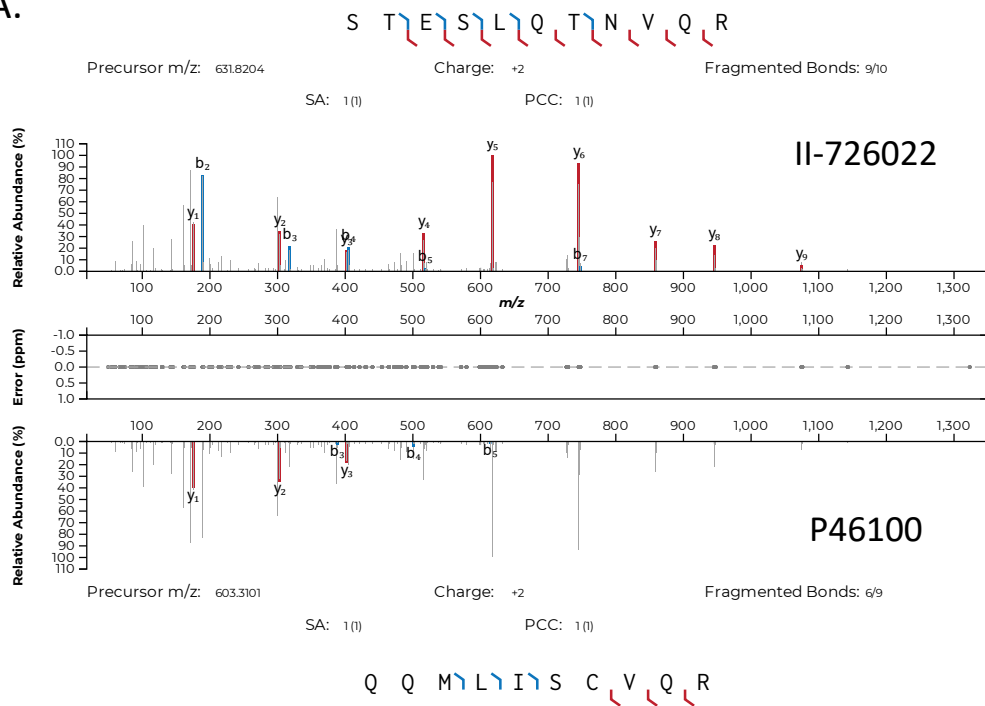

B.

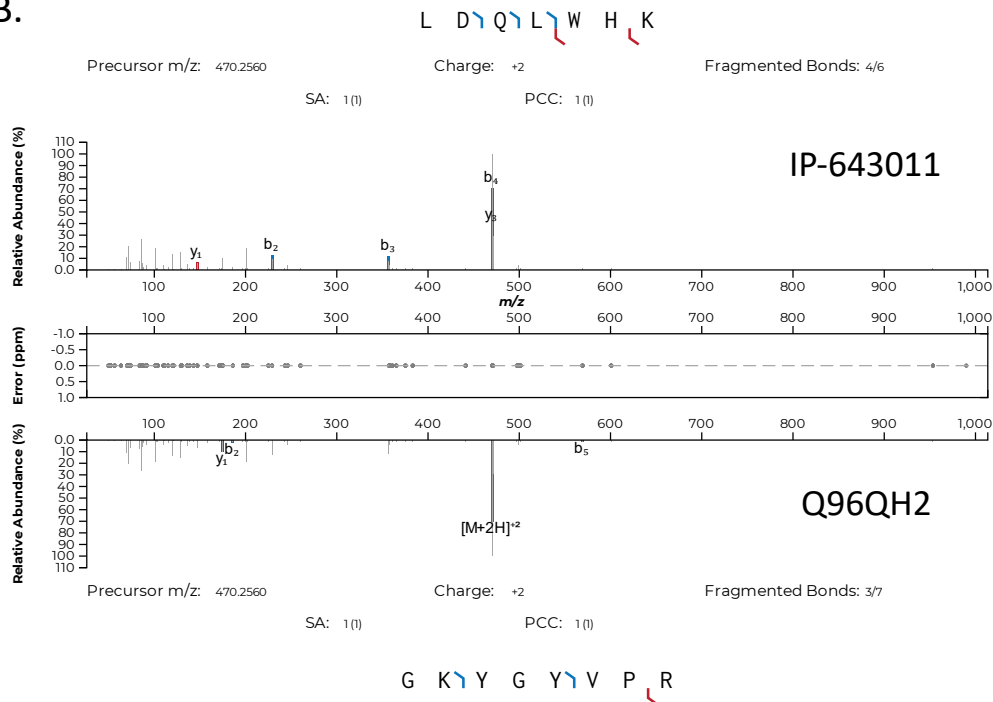

**Supplementary Figure 3: Examples of MS2 spectra assigned to a reference protein with a canonical protein database and reassigned to an alternative protein with a database containing canonical proteins, altProts, and novel isoforms.** MS/MS spectrum confidently mapped to either a peptide unique to the reference protein P46100 (A) or Q96QH2 (B) using a database containing canonical proteins only (bottom spectrum), or to a peptide unique to the novel isoform II\_726022 (A) or IP\_643011 (B) using a database containing canonical proteins, altProts, and novel isoforms (top spectrum). Peaks are represented by their mass over charge ratios (m/z) and their intensity relative to the highest (relative intensity). The y ions are colored in red, the b ions in blue and the unannotated peaks appear in grey.

**Supplementary Table 1**

variant\_canonical: variants in canonical proteins. The Ensembl accession ID is indicated in the first co

variant\_non-canonical: variants in altProts (accession ID: IP\_XXXXXX) and novel isoforms (accession

| Variant                                                              | Numer of patient |
|----------------------------------------------------------------------|------------------|
| ENSP00000357535.3@Thr75IleVal11Ala[Thr194Thr]                        | 15               |
| ENSP00000257829.7@Tyr461His[Pro562Pro]                               | 12               |
| ENSP00000216605.12@Lys134ArgArg653Gln                                | 11               |
| ENSP00000323889.8@Pro358Leu                                          | 11               |
| ENSP00000272163.8@Ser154Asn[Pro87ProVal39Val]                        | 9                |
| ENSP00000345445.4@Asp110GlyIle345Val[Gly137GlyHis260HisLeu339LeuGly] | 9                |
| ENSP00000310182.5@Leu7ArgGly32Glu                                    | 8                |
| ENSP00000342139.10@Phe19TyrArg36CysMet56ValArg184Ser[Pro24ProLeu1]   | 8                |
| ENSP00000267884.10@Pro124Ala[Leu94LeuLys43Lys]                       | 8                |
| ENSP00000366934.5@Ser58AlaTrp50ArgArg10Trp[Asp476Asp]                | 7                |
| ENSP00000236959.13@Thr116Ser                                         | 7                |
| ENSP00000371193.8@Lys241ArgAla19Asp                                  | 7                |
| ENSP00000357835.9@Gln94Arg                                           | 6                |
| ENSP00000216714.7@Ile64ValAsp148Glu                                  | 6                |
| ENSP00000483501.4@Pro85Thr                                           | 5                |
| ENSP00000316990.5@Ser52Ala[Ala102Ala]                                | 5                |
| ENSP00000366927.3@Arg107LeuVal253Met[Ile65Ile]                       | 5                |
| ENSP00000390783.6@Lys63Arg                                           | 5                |
| ENSP00000246747.8@Val141Ala                                          | 5                |
| ENSP00000362463.4@Glu111Ala                                          | 5                |
| ENSP00000419475.5@Ile113Leu[Asn189AsnLeu165Leu]                      | 5                |
| ENSP00000303992.4@Lys168AsnMet179Thr                                 | 5                |
| ENSP00000364475.8@Arg218LysArg218Lys[Gly320Gly]                      | 5                |
| ENSP00000221957.8@Val275AlaIle56Val[Phe221PheLeu186LeuSer175Ser]     | 5                |
| ENSP00000266556.7@Ala42ValMet146ValThr165AlaAla169Val[Cys39CysPro1]  | 5                |
| ENSP00000482543.1@Ala35Val                                           | 5                |
| ENSP00000005587.6@Ala202Ser                                          | 4                |
| ENSP00000318883.9@Pro360Ser[Ser257Ser]                               | 4                |
| ENSP00000268058.7@Phe645Leu                                          | 4                |
| ENSP00000393292.8@Met25ThrPro155Arg[Ala380Ala]                       | 4                |
| ENSP00000363031.7@Lys511GluThr366Met[Leu490Leu]                      | 4                |
| ENSP00000362298.7@Val21Leu[Ile188IleAla241AlaVal314Val]              | 4                |
| ENSP00000387654.6@Ser149Phe                                          | 4                |
| ENSP00000279146.7@Gln228Lys                                          | 4                |
| ENSP00000350191.7@His180Tyr                                          | 4                |
| ENSP00000400646.6@Ter784fsIle121Val[Arg464Arg]                       | 4                |
| ENSP00000355990.5@Gln109Glu                                          | 4                |
| ENSP00000307288.9@Asn144Ser[Ile537Ile]                               | 4                |
| ENSP00000395473.6@Val411GlyArg337GlnThr312IleLeu278Val               | 4                |
| ENSP00000296424.8@Asn70Ser                                           | 3                |
| ENSP00000221957.8@Val275AlaIle56Val[Phe221PheLeu186LeuSer175Ser]     | 3                |
| ENSP00000358727.9@Ala140Asp                                          | 3                |
| ENSP00000371193.8@Lys241ArgAla19Asp                                  | 3                |
| ENSP00000457421.5@Val125LeuArg670GlySer563Asn[His484His]             | 3                |
| ENSP00000362463.4@Glu111Ala                                          | 3                |
| ENSP00000360939.9@Gln80HisGly8Arg                                    | 3                |

|                                                                     |   |
|---------------------------------------------------------------------|---|
| ENSP00000243346.9@Ser16Leu[Gln39Gln]                                | 3 |
| ENSP00000261623.7@Tyr72HisVal174Ala[Glu12Glu]                       | 3 |
| ENSP00000288245.10@Leu79fs                                          | 3 |
| ENSP00000358640.7@Asp490Glu                                         | 3 |
| ENSP00000382327.7@Gln270ArgLeu232Phelle79Leu                        | 3 |
| ENSP00000410833.6@Ile334ValArg190Gly                                | 3 |
| ENSP00000263033.9@Ile420Val                                         | 3 |
| ENSP00000264263.9@Val215Ile[Ala6Ala]                                | 3 |
| ENSP00000365625.7@Asp566Gly                                         | 3 |
| ENSP00000366934.5@Ser58AlaTrp50ArgArg10Trp[Leu111LeuAsp476Asp]      | 3 |
| ENSP00000354086.9@Cys366Ser[Gly402Gly]                              | 3 |
| ENSP00000273130.8@Gln277Arg                                         | 3 |
| ENSP00000358727.9@Ala140Asp                                         | 3 |
| ENSP00000261416.11@Leu62SerIle207Val                                | 3 |
| ENSP00000216181.10@Ile1626ValVal1366GlySer1163AlaVal834Gly[Ala1143A | 3 |
| ENSP00000356505.7@Lys181ArgArg395Trp                                | 2 |
| ENSP00000311977.11@Arg185Gly[Ala477Ala]                             | 2 |
| ENSP00000261416.11@Leu62Ser                                         | 2 |
| ENSP00000359504.4@Ala409GlyThr349Ser                                | 2 |
| ENSP00000266556.7@Ala42ValMet146ValThr165AlaAla169Val[Cys39CysPro1  | 2 |
| ENSP00000260985.6@Val178Ile[Gly105Gly]                              | 2 |
| ENSP00000264108.4@Val314Ala                                         | 2 |
| ENSP00000346483.7@Ala303Thr                                         | 2 |
| ENSP00000413572.8@Arg169LysPro6AlaSer434AsnTyr406His[His455His]     | 2 |
| ENSP00000266070.8@Thr1568Ala[Gly657GlyAla621Ala]                    | 2 |
| ENSP00000366927.3@Ala86ValArg107LeuVal253Met[Thr61ThrIle65Ile]      | 2 |
| ENSP00000234170.9@Val102Ile[Ser931Ser]                              | 2 |
| ENSP00000238256.7@His413GlnAla106Thr[Leu1096Leu]                    | 2 |
| ENSP00000313420.6@Ile3434Thr                                        | 2 |
| ENSP00000254508.6@Val1787MetLeu1752SerArg786LeuAla755ValIle608ValA  | 2 |
| ENSP00000360305.6@Asn175Ser                                         | 2 |
| ENSP00000359483.8@Asp205GlyAsn468SerMet800Ile                       | 2 |
| ENSP00000279146.7@Gln228Lys                                         | 2 |
| ENSP00000261416.11@Leu62SerIle207Val                                | 2 |
| ENSP00000254719.9@Thr351Ala[Gln4GlnSer352SerSer535Ser]              | 2 |
| ENSP00000216181.10@Ile1626ValVal1366GlySer1163AlaVal834Gly[Ala1143A | 2 |
| ENSP00000221486.5@Leu202SerAsp205Glu[Thr11ThrGln154Gln]             | 2 |
| ENSP00000258787.11@Gln861ArgMet489Thr[His494HisAsn416Asn]           | 2 |
| ENSP00000395249.6@Arg374His                                         | 2 |
| ENSP00000265394.9@Ala435Val                                         | 2 |
| ENSP00000318883.9@Ile46Arg[Ser257SerAsn292Asn]                      | 2 |
| ENSP00000383935.7@Met323Val                                         | 2 |
| ENSP00000393566.5@Thr259ProPhe191ValLeu158ProLys142ArgThr114AlaGli  | 2 |
| ENSP00000238379.9@Gly146Glu                                         | 2 |
| ENSP00000457421.5@Arg670GlySer563AsnVal125Leu[His484His]            | 2 |
| ENSP00000395249.6@Arg374HisPro419Gln                                | 2 |
| ENSP00000371236.8@Asp752GlyVal421Ile                                | 2 |



|                                                                      |   |
|----------------------------------------------------------------------|---|
| ENSP00000378782.8@Thr195AlaAla158Val                                 | 2 |
| ENSP00000261893.8@Met5LeuArg469Lys                                   | 2 |
| ENSP00000216336.2@Asn125Ser                                          | 2 |
| ENSP00000360305.6@Asn175Ser                                          | 2 |
| ENSP00000351100.9@Cys151Arg[Asn131Asn]                               | 2 |
| ENSP00000303525.7@Leu70Met                                           | 2 |
| ENSP00000266070.8@Thr1568AlaAla556ThrMet544Thr[Gly657GlyAla621Ala]   | 2 |
| ENSP00000229854.11@Glu777Lys                                         | 2 |
| ENSP00000410707.6@Asn397SerAsn365HisIle240ValLeu223Phe               | 2 |
| ENSP00000216714.7@Ile64ValAsp148Glu                                  | 2 |
| ENSP00000351100.9@Cys151Arg                                          | 2 |
| ENSP00000308493.10@Ser234Pro[Ala652Ala]                              | 2 |
| ENSP00000254663.10@Ala183Thr                                         | 2 |
| ENSP00000258787.11@Gln861ArgMet489ThrVal49Met[His494HisAsn416Asn]    | 2 |
| ENSP00000367923.8@Ser199Thr                                          | 2 |
| ENSP00000263897.9@Leu154Ser                                          | 2 |
| ENSP00000251047.5@Met410Leu[Arg117Arg]                               | 2 |
| ENSP00000343912.7@Val6AlaGlu360GlnPro567SerIle656ValGly695Arg        | 2 |
| ENSP00000325017.9@Gln83GluArg1241HisThr1321Ser[Ile640IleVal1267ValAs | 2 |
| ENSP00000400646.6@Ter784fsIle121Val[Arg464Arg]                       | 2 |
| ENSP00000382327.7@Gln270ArgLeu232Phelle79Leu                         | 2 |
| ENSP00000375808.7@Lys673GlnAsp234Asn[Asp633Asp]                      | 2 |
| ENSP00000254508.6@Val1787MetLeu1752SerPro821AlaArg786Leulle608Val/   | 2 |
| ENSP00000298299.3@Ser65Gly[Ser152Ser]                                | 2 |
| ENSP00000323889.8@Pro358Leu                                          | 2 |
| ENSP00000267884.10@Pro124Ala[Leu94LeuArg59ArgLys43Lys]               | 2 |
| ENSP00000366934.5@Ser58AlaTrp50ArgCys13ArgArg10Trp[Asp476Asp]        | 2 |
| ENSP00000363999.4@Leu127Phe[Ala145Ala]                               | 2 |
| ENSP00000313420.6@Ile3434Thr                                         | 2 |
| ENSP00000261396.5@Gln406ArgIle294Val[Leu486LeuTyr186Tyr]             | 2 |
| ENSP00000246024.6@Gly303Arg[Pro152Pro]                               | 2 |
| ENSP00000268058.7@Phe645Leu[Ala652Ala]                               | 2 |
| ENSP00000261416.11@Leu62SerLys121ArgIle207Val                        | 2 |
| ENSP00000440502.5@Gln145HisArg678His[Thr646Thr]                      | 2 |
| ENSP00000345719.4@Asp216His                                          | 2 |
| ENSP00000376162.7@Ser342Arg[Tyr89Tyr]                                | 2 |
| ENSP00000350191.7@His180Tyr                                          | 2 |
| ENSP00000393292.8@Met25ThrPro155Arg[Ala380Ala]                       | 2 |
| ENSP00000263245.9@Ser355Arg[Ser477SerSer451Ser]                      | 2 |
| ENSP00000261416.11@Leu62SerLys121Arg                                 | 2 |
| ENSP00000266070.8@Thr1568AlaAla556ThrMet544Thr[Gly657GlyAla621Ala]   | 2 |
| ENSP00000350961.4@Pro28Thr[Leu43Leu]                                 | 2 |
| ENSP00000246957.9@Arg307GlyArg13Cys[Asp684Asp]                       | 2 |
| ENSP00000418755.5@Val215Ile[Ala6Ala]                                 | 2 |
| ENSP00000366005.9@Phe33TyrAla114AspSer129ProGlu176AlaLeu180GlnAsp    | 1 |
| ENSP00000412178.5@Gln21Arg                                           | 1 |
| ENSP00000383743.7@Gln353Glu[Gln52GlnAla208Ala]                       | 1 |

|                                                                      |   |
|----------------------------------------------------------------------|---|
| ENSP00000367011.8@Thr296ArgAsn630AspAsn239Ser[Thr559Thr]             | 1 |
| ENSP00000261366.9@Arg208His                                          | 1 |
| ENSP00000416778.5@Val108Met[Leu86LeuPro149ProHis12HisGln195Gln]      | 1 |
| ENSP00000346634.9@Ala201Val[Tyr107Tyr]                               | 1 |
| ENSP00000357823.7@Glu210Ala                                          | 1 |
| ENSP00000345445.4@Asp110GlyIle345Val[Gly137GlyHis260HisLeu339LeuGly  | 1 |
| ENSP00000234170.9@Val102Ile                                          | 1 |
| ENSP00000254719.9@Thr351Ala[Gln4GlnSer535SerSer352Ser]               | 1 |
| ENSP00000334263.8@Leu26MetSer146AlaArg152SerVal160Ala[Ala21Ala]      | 1 |
| ENSP00000489631.1@Val368IleMet624ValPhe352Cys                        | 1 |
| ENSP00000273130.8@Gln277Arg[Asp372Asp]                               | 1 |
| ENSP00000264663.9@Lys63ArgLeu663Phe[Leu16Leu]                        | 1 |
| ENSP00000380227.6@Arg878Gln[Leu993Leu]                               | 1 |
| ENSP00000395473.6@Val411GlyArg337GlnThr312Ile                        | 1 |
| ENSP00000482543.1@Ala35Val                                           | 1 |
| ENSP00000322845.9@Glu468Asp                                          | 1 |
| ENSP00000417229.5@Thr97Ser                                           | 1 |
| ENSP00000254508.6@Val1787MetLeu1752SerPro821AlaArg786Leulle608Val/   | 1 |
| ENSP00000418755.5@Val215Ile[Ala6Ala]                                 | 1 |
| ENSP00000367263.8@Gln3142ArgGln3003LysPro5390ThrAsn3637SerVal1098    | 1 |
| ENSP00000328062.9@Val901Ile                                          | 1 |
| ENSP00000440502.5@Gln145HisArg678His[Thr646Thr]                      | 1 |
| ENSP00000453361.5@Pro44Ala[Leu14Leu]                                 | 1 |
| ENSP00000353224.8@Gly142Ser                                          | 1 |
| ENSP00000393566.5@Thr259ProPhe191ValLeu158ProLys142ArgThr114AlaGli   | 1 |
| ENSP00000266070.8@Thr1568Ala[Gly657GlyPro968Pro]                     | 1 |
| ENSP00000224949.8@Gln1037ArgGln516HisAla397ValIle328Val[Arg1007ArgP  | 1 |
| ENSP00000290299.6@Lys98Arg[Asn107AsnGly36Gly]                        | 1 |
| ENSP00000321706.5@Arg1033CysAsp929AsnIle739ThrGlu593ValAla579GlyGl   | 1 |
| ENSP00000363999.4@Leu127Phe[Ala145Ala]                               | 1 |
| ENSP00000337773.6@Lys16ArgLeu47Phe[Pro110ProSer146Ser]               | 1 |
| ENSP00000320563.11@Ser1528ProArg1816GlnSer2527AsnVal1677MetPro31     | 1 |
| ENSP00000355569.7@Leu93_Gln94insGlnSer78Pro                          | 1 |
| ENSP00000354125.8@Ser64ProPro709Arg[Asn145Asn]                       | 1 |
| ENSP00000308179.5@Ala210Val                                          | 1 |
| ENSP00000418194.6@Arg450LysAla561Glu[Tyr1441Tyr]                     | 1 |
| ENSP00000261623.7@Tyr72HisVal174Ala[Glu12GluPro160Pro]               | 1 |
| ENSP00000405677.5@Ser427ProAla407Prolle271MetSer438PheAla407ProGlu   | 1 |
| ENSP00000246957.9@Asp395GluArg307GlyArg13Cys[Asp684Asp]              | 1 |
| ENSP00000408146.6@PheAla64LeuValAla65ValAla84GluAlaAla84AspGluLys9E  | 1 |
| ENSP00000224949.8@Gln1037ArgGln516HisAla397ValIle328ValVal963IleGln8 | 1 |
| ENSP00000317123.9@Met387Val[Leu1773Leu]                              | 1 |
| ENSP00000257829.7@Tyr461HisAla983Thr[Pro562Pro]                      | 1 |
| ENSP00000001008.5@Asn197Lys                                          | 1 |
| ENSP00000310182.5@Leu7ArgGly32Glu                                    | 1 |
| ENSP00000320563.11@Ser1528ProArg1816GlnSer2527AsnAla1833SerGly203    | 1 |
| ENSP00000240617.9@Pro534AlaVal265IleLeu18ProLeu19del[Pro16ProLeu29C  | 1 |

|                                                                      |   |
|----------------------------------------------------------------------|---|
| ENSP00000330836.9@Gln21HisPro123Ser                                  | 1 |
| ENSP00000355541.7@Glu2017GlyAsn1967AspVal1854AlaAsn1694SerMet607     | 1 |
| ENSP00000328062.9@Val901Ile                                          | 1 |
| ENSP00000263636.4@Lys1321AsnAsp807GluAsp692Asn[Ala848AlaThr459Thr    | 1 |
| ENSP00000364032.2@Ter687Glnext*?Thr665AlaGly604GlyMet577ValLys54Ly   | 1 |
| ENSP00000290541.6@Ile234Thr[Pro25Pro]                                | 1 |
| ENSP00000387654.6@Ser149Phe                                          | 1 |
| ENSP00000312671.8@Val133LeuArg307GlnVal538GlyAsp569Val[Ala977Ala]    | 1 |
| ENSP00000376162.7@Ser342Arg                                          | 1 |
| ENSP00000367263.8@Gln3003LysPro5390ThrAsn3637SerVal1098Phe[Thr566    | 1 |
| ENSP00000344848.7@Arg2832HisSer2654ProAla2057ValHis1322ArgArg1249C   | 1 |
| ENSP00000421592.2@Ala247Val                                          | 1 |
| ENSP00000234677.6@Gly387Glu                                          | 1 |
| ENSP00000446475.5@Gly39Glu                                           | 1 |
| ENSP00000325017.9@Gln83GluArg1241HisThr1321Ser[Ile640IleVal1267ValAr | 1 |
| ENSP00000345079.6@Lys108Ile                                          | 1 |
| ENSP00000353099.5@Gln178HisMet171ValAla169ThrLeu162ArgGln125HisVa    | 1 |
| ENSP00000314499.8@Gln877ArgLys801Glulle413Val[Ala1273AlaAla1045AlaSc | 1 |
| ENSP00000425956.6@Met319ThrMet370ThrGln1182LysVal1244MetGlu1321C     | 1 |
| ENSP00000305692.7@His199ArgArg223HisVal780IleGly576SerGlu689Lys[Cys1 | 1 |
| ENSP00000251166.8@Arg193GlnArg528Gln[Gly519Gly]                      | 1 |
| ENSP00000371193.8@Lys241ArgAla19Asp                                  | 1 |
| ENSP00000290299.6@Lys98Arg[Asn107Asn]                                | 1 |
| ENSP00000416028.5@Ala46Thr                                           | 1 |
| ENSP00000244815.9@Asn394SerHis759Asp[Thr257ThrGlu300GluGlu487GluA:   | 1 |
| ENSP00000483688.4@Met34Leu                                           | 1 |
| ENSP00000264870.7@Pro565LeuVal35Leu                                  | 1 |
| ENSP00000316029.9@Gln1757ArgSer1227LeuVal2376Gly[Thr1867ThrAla202E   | 1 |
| ENSP00000352678.8@Pro692Leu[Ala48Ala]                                | 1 |
| ENSP00000346634.9@Ala201Val                                          | 1 |
| ENSP00000496460.1@His471Gln                                          | 1 |
| ENSP00000216714.7@Ile64ValGln51HisAsp148Glu                          | 1 |
| ENSP00000331897.7@Arg140Gln                                          | 1 |
| ENSP00000329219.7@Pro455AlaPro587ProLeu650LeuTrp1007*Ser336Ser       | 1 |
| ENSP00000340690.8@Pro399fsLeu29SerSer397AlaGlu395Ala                 | 1 |
| ENSP00000358727.9@Ala140AspGlu208Lys                                 | 1 |
| ENSP00000367263.8@Gln3003LysGly2527AspPro5390ThrAsn3637SerVal1098    | 1 |
| ENSP00000443900.4@Ser11Ala                                           | 1 |
| ENSP00000355672.3@Gly211Ser                                          | 1 |
| ENSP00000443671.5@Gln368ArgArg163TrpArg249His[Gln601GlnPro175Pro]    | 1 |
| ENSP00000268097.9@Ile436Val[Glu506Glu]                               | 1 |
| ENSP00000490492.1@Val368IlePhe352Cys                                 | 1 |
| ENSP00000418842.7@Ala9Val                                            | 1 |
| ENSP00000458166.5@Arg98Gly[Asp475Asp]                                | 1 |
| ENSP00000346634.9@Ala201Val                                          | 1 |
| ENSP00000357535.3@Thr75IleVal11Ala[Thr194Thr]                        | 1 |
| ENSP00000272163.8@Ser154Asn[Pro87ProVal39Val]                        | 1 |

|                                                                      |   |
|----------------------------------------------------------------------|---|
| ENSP00000221418.8@Gly217ArgGlu41Ala                                  | 1 |
| ENSP00000433982.2@Arg1732HisSer1554ProHis1349ArgArg1276GlnAla531V;   | 1 |
| ENSP00000299767.9@Glu791delMet293Val[Thr219ThrPro759Pro]             | 1 |
| ENSP00000274364.10@Asp527GluLys532GluLeu629Phe[Leu154LeuAla524Ala    | 1 |
| ENSP00000366934.5@Ser58AlaTrp50Arg[Asp476Asp]                        | 1 |
| ENSP00000224949.8@Gln1037ArgGln516HisAla397ValIle328ValVal621IlePhe1 | 1 |
| ENSP00000427615.5@Leu70Met                                           | 1 |
| ENSP00000261416.11@Leu62SerIle207ValLys338fs                         | 1 |
| ENSP00000371193.8@Lys241ArgAla19Asp                                  | 1 |
| ENSP00000478837.1@Ala7_Alal8del                                      | 1 |
| ENSP00000356505.7@Arg395TrpLys181Arg                                 | 1 |
| ENSP00000387654.6@Ser149Phe[Leu8Leu]                                 | 1 |
| ENSP00000355990.5@Leu79PheGln109Glu                                  | 1 |
| ENSP00000264932.10@Asp38ValTyr629PheVal657Ile[Pro297ProAla103AlaArg  | 1 |
| ENSP00000276585.8@Arg48Pro                                           | 1 |
| ENSP00000319141.8@Ser266Asn                                          | 1 |
| ENSP00000264832.7@Lys469Glu                                          | 1 |
| ENSP00000269321.11@Asp44Tyr                                          | 1 |
| ENSP00000358727.9@Ala140Asp                                          | 1 |
| ENSP00000261416.11@Leu62SerLys121Arg                                 | 1 |
| ENSP00000366934.5@Ser58AlaTrp50ArgArg10Trp[Asp476Asp]                | 1 |
| ENSP00000365477.6@Pro228Leu                                          | 1 |
| ENSP00000367263.8@Gln3003LysGly2527AspVal1274AlaPro5390ThrAsn3637    | 1 |
| ENSP00000269159.7@Arg158Gln                                          | 1 |
| ENSP00000264930.9@Ala408ThrMet774Thr[Ser999SerTyr900TyrVal812ValPro  | 1 |
| ENSP00000330836.9@Asp101Val                                          | 1 |
| ENSP00000362463.4@Glu111Ala                                          | 1 |
| ENSP00000367011.8@Thr296ArgAsn630AspAsn239Ser[Thr559Thr]             | 1 |
| ENSP00000433982.2@Arg1732HisSer1554ProHis1349ArgArg1276GlnAla531V;   | 1 |
| ENSP00000263774.8@Val159Leu                                          | 1 |
| ENSP00000217426.6@Gly123Arg                                          | 1 |
| ENSP00000260197.11@Ala528ThrGln1074GluVal1967IleThr1483Ala[His269Hi  | 1 |
| ENSP00000408146.6@PheAla64LeuValAla65ValAla84GluAlaAla84AspGluLys98  | 1 |
| ENSP00000416028.5@Ala46ThrGlu183Asp                                  | 1 |
| ENSP00000320563.11@Ser1528ProArg1816GlnSer2527AsnPro3118Leu[Gln21    | 1 |
| ENSP00000246043.8@Arg1324LeuSer1199LeuLeu1043HisGln596Arg[Thr894T    | 1 |
| ENSP00000399294.5@His344GlnLys136ArgArg350Trp[Ala157Ala]             | 1 |
| ENSP00000354573.6@Ser4670ThrAla4350Thr[Gln257Gln]                    | 1 |
| ENSP00000443671.5@Gln368ArgArg163TrpArg249His[Gln601GlnPro175Pro]    | 1 |
| ENSP00000330836.9@Pro123Ser                                          | 1 |
| ENSP00000364549.7@Ile1579ValPro809AlaVal189Ala[Pro1742ProThr1590Thr  | 1 |
| ENSP00000438536.6@Phe20LeuVal1149Gly[Ala332Ala]                      | 1 |
| ENSP00000260985.6@Arg132His                                          | 1 |
| ENSP00000363031.7@Phe111LeuLys511GluThr366Met[Leu490Leu]             | 1 |
| ENSP00000311469.9@Lys173Asn                                          | 1 |
| ENSP00000433982.2@Arg1732HisSer1554ProHis1349ArgArg1276GlnAla531V;   | 1 |
| ENSP00000354812.9@Ile369ThrThr130Arg[Ala297Ala]                      | 1 |

|                                                                      |   |
|----------------------------------------------------------------------|---|
| ENSP00000310491.8@Leu263Phe[Lys153Lys]                               | 1 |
| ENSP00000251166.8@Arg193Gln                                          | 1 |
| ENSP00000271583.7@Gln294HisMet146ThrPro277Arg[Ala517Ala]             | 1 |
| ENSP00000264093.8@Gln170Arg                                          | 1 |
| ENSP00000224949.8@Gln1037ArgGln516HisAla397ValIle328ValGly1017SerVa  | 1 |
| ENSP00000288050.8@Thr29AlaTyr110HisIle206ValAsn662Lys[Ser657SerAsp7! | 1 |
| ENSP00000370718.8@Arg541LysTyr364HisSer228Pro[Thr462ThrGly244GlyArg  | 1 |
| ENSP00000356218.8@Asn44Ser                                           | 1 |
| ENSP00000288266.7@Glu700Gly                                          | 1 |
| ENSP00000358548.4@Gly12Asp                                           | 1 |
| ENSP00000263636.4@Lys1321AsnAsp807Glu[Thr459ThrLeu402Leu]            | 1 |
| ENSP00000364114.3@Ala169ThrSer164GlyTyr89SerAsp86ValVal265LeuLys25:  | 1 |
| ENSP00000400646.6@Ter784fsIle121Val[Arg464Arg]                       | 1 |
| ENSP00000364032.2@Ter687Glnext*?Thr665AlaGly604GlyMet577ValLys54Ly   | 1 |
| ENSP00000367263.8@Gln3003LysPro5390ThrAsn3637SerVal1098Phe[Ser264    | 1 |
| ENSP00000328062.9@Val901Ile[Ala940Ala]                               | 1 |
| ENSP00000345719.4@Asp216His[Ala82Ala]                                | 1 |
| ENSP00000367992.7@Gly190Glu                                          | 1 |
| ENSP00000274813.3@Ile671ValAla499ThrArg532His[Lys212Lys]             | 1 |
| ENSP00000395473.6@Val411GlyAsn413SerArg337GlnThr312Ile               | 1 |
| ENSP00000354283.7@Gln791ArgVal760IleAsp894Asn[Leu1018LeuGly212Gly]   | 1 |
| ENSP00000420176.1@Gly17Val                                           | 1 |
| ENSP00000376162.7@Ser342Arg[Leu91LeuTyr89Tyr]                        | 1 |
| ENSP00000309965.8@Arg186TrpGln567GluVal808IleAla798Val[Cys285CysLeu  | 1 |
| ENSP00000384407.6@Ile96Val[Ser55SerAsp415Asp]                        | 1 |
| ENSP00000262460.4@Val97Ile                                           | 1 |
| ENSP00000216181.10@Ile1626ValVal1366GlySer1163AlaVal834Gly[Ala1143A  | 1 |
| ENSP00000246043.8@Arg1324LeuSer1199LeuLeu1043His                     | 1 |
| ENSP00000312356.6@Pro56Arg                                           | 1 |
| ENSP00000311130.6@Gln184Arg                                          | 1 |
| ENSP00000224949.8@Gln1037ArgGln516HisAla397ValIle328ValVal963IleGln8 | 1 |
| ENSP00000367265.4@Ala348Thr                                          | 1 |
| ENSP00000498202.1@Leu600Met                                          | 1 |
| ENSP00000348380.8@Ser97LeuLeu346Phe                                  | 1 |
| ENSP00000231572.7@Val3IleVal328Ile[Ala499Ala]                        | 1 |
| ENSP00000334983.9@Arg278Trp                                          | 1 |
| ENSP00000496947.1@Asn114Ser[Ala250Ala]                               | 1 |
| ENSP00000320563.11@Ser1528ProArg1816GlnSer2527AsnSer214Pro[Gln213    | 1 |
| ENSP00000481126.4@Lys889ArgAla588Thr[Gly162GlyCys660CysTyr422Tyr]    | 1 |
| ENSP00000353224.8@Gly142Ser                                          | 1 |
| ENSP00000321706.5@Arg1033CysAsp929AsnIle739ThrAla579GlyGln450GluAr   | 1 |
| ENSP00000345719.4@Asp216His                                          | 1 |
| ENSP00000315630.10@Gln505Glu[Arg230ArgAsn348Asn]                     | 1 |
| ENSP00000261416.11@Leu62SerIle207Val                                 | 1 |
| ENSP00000220325.8@Val154Ile[Phe282Phe]                               | 1 |
| ENSP00000429764.5@Ile214Thr                                          | 1 |
| ENSP00000366005.9@Phe33TyrAla114AspSer129ProGlu176AlaLeu180GlnAsp    | 1 |

ENSP00000216605.12@Lys134ArgArg653Gln 1  
ENSP00000355541.7@Glu2017GlyAsn1967AspVal1854AlaAsn1694SerMet607 1  
ENSP00000478779.4@Gly820SerVal371Gly[Pro306ProPro23Pro] 1  
ENSP00000364032.2@Ter687Glnext\*?Thr665AlaGly604GlyMet577ValLys54Ly 1  
ENSP00000393292.8@Met25ThrPro155Arg[Ala380Ala] 1  
ENSP00000413572.8@Pro6AlaSer434AsnTyr406HisArg169Lys[His455His] 1  
ENSP00000199706.12@His27Tyr[Tyr139TyrLeu119LeuLeu14Leu] 1  
ENSP00000328062.9@Val901Ile[Ala940Ala] 1  
ENSP00000261741.9@Gln602GluArg921Gln[Thr606Thr] 1  
ENSP00000417229.5@Thr97Ser[Asp172Asp] 1  
ENSP00000316772.6@Glu259AspArg139HisSer439Gly[Pro587ProGln753GlnTr 1  
ENSP00000293195.9@Gln123Arg[Ala250Ala] 1  
ENSP00000254508.6@Val1787MetLeu1752SerArg786Leulle608ValAla297Thr[ 1  
ENSP00000318883.9@Ile46ArgPro360Ser[Ser257SerAsn292Asn] 1  
ENSP00000348577.7@Phe25Leu[Leu516Leu] 1  
ENSP00000238508.7@Ser3AlaIle41MetIle99ThrPro140SerArg246Cys 1  
ENSP00000402510.6@Ile22MetLys350ArgHis595TyrSer175Leu[Leu179LeuVal 1  
ENSP00000221418.8@Gly217ArgGlu41Ala 1  
ENSP00000261667.7@Lys121Arg[Pro234ProAla307Ala] 1  
ENSP00000377486.6@Ile150Val 1  
ENSP00000364114.3@Ala169ThrSer164GlyTyr89SerAsp86ValVal265LeuLys25: 1  
ENSP00000307387.7@Ala309ThrVal378IleAsn550Ser[Ser637SerPro845Pro] 1  
ENSP00000316029.9@Ser1227LeuGlu317LysVal2376Gly[Thr1867ThrThr1154T 1  
ENSP00000358640.7@Asp490Glu 1  
ENSP00000367263.8@Gln3003LysPro5390ThrAsn3637SerVal1098Phe[Ser264 1  
ENSP00000300482.9@Gln1189ArgVal1240MetGly895Arg 1  
ENSP00000440671.6@Gly10CysMet617ThrGlu1135Gly[Asp953AspAla1200Ala 1  
ENSP00000306070.9@Cys114ArgArg209Gln[Pro4Pro] 1  
ENSP00000286953.7@Ile9Val 1  
ENSP00000399273.6@Thr122Ile 1  
ENSP00000323065.2@Pro79Ala 1  
ENSP00000452562.5@Glu285GlnPro535SerIle624ValGly663Arg 1  
ENSP00000264187.6@Val246IleGln1246ArgGln807His[Ser159SerLeu1063Leu\ 1  
ENSP00000380227.6@Arg878Gln[Thr615ThrHis961HisLeu993Leu] 1  
ENSP00000224949.8@Gln1037ArgGln516HisAla397ValIle328ValPhe169Ser[Ar 1  
ENSP00000364114.3@Ala169ThrSer164GlyTyr89SerAsp86ValVal265LeuLys25: 1  
ENSP00000227266.9@Ile453ValIle153Thr[Thr391Thr] 1  
ENSP00000325618.11@Val630AlaLeu395Prolle249Val[His71His] 1  
ENSP00000353099.5@Gln178HisMet171ValAla169ThrLeu162ArgGln125HisVa 1  
ENSP00000246043.8@Arg1324LeuSer1199LeuLeu1043His 1  
ENSP00000395473.6@Val411GlyAla481SerArg337GlnThr312Ile 1  
ENSP00000263245.9@Ser355Arg[Ser477SerSer451Ser] 1  
ENSP00000365175.8@Thr544LysLeu1503ProArg1740HisLeu1895ValPro106Le 1  
ENSP00000416778.5@Val108Met[Leu86LeuPro149ProHis12His] 1  
ENSP00000236051.2@Arg223His[Thr130Thr] 1  
ENSP00000246957.9@Arg307GlySer259Leu[Asp684AspTyr344Tyr] 1  
ENSP00000333551.7@Thr245Met 1

|                                                                     |   |
|---------------------------------------------------------------------|---|
| ENSP00000236671.6@Ala58ValAla337Thr[Thr155ThrAla77Ala]              | 1 |
| ENSP00000293195.9@Gln123Arg[Ala250Ala]                              | 1 |
| ENSP00000274306.6@Met121Thr[Asp140AspGly154Gly]                     | 1 |
| ENSP00000368031.7@Arg176Gln[Gly36GlyPro583ProThr288Thr]             | 1 |
| ENSP00000366620.6@Arg453Gln[Tyr673TyrSer706SerAla212AlaAla247Ala]   | 1 |
| ENSP00000393566.5@Thr259ProPhe191ValLeu158ProLys142ArgThr114AlaGln  | 1 |
| ENSP00000321988.11@Val223Met                                        | 1 |
| ENSP00000306080.8@Gly45GluAla8Ser                                   | 1 |
| ENSP00000365402.9@Thr363AlaCys350SerVal319AlaMet309ValGln277GluArg  | 1 |
| ENSP00000418401.6@Val9Leu                                           | 1 |
| ENSP00000302111.7@Leu115PheIle174ValLys209Arg[Leu84Leu]             | 1 |
| ENSP00000266070.8@Thr1568AlaAla556ThrMet544Thr[Gly657GlyAla621Ala]  | 1 |
| ENSP00000418194.6@Arg450LysAla561Glu[Pro883ProTyr1441Tyr]           | 1 |
| ENSP00000243346.9@Ser16Leu[Gln39Gln]                                | 1 |
| ENSP00000311300.7@Gln29ProSer139Gly[Asp175Asp]                      | 1 |
| ENSP00000427108.1@Ala242del[Ser65Ser]                               | 1 |
| ENSP00000357129.8@Ile2265ThrLeu1858ValCys1568ArgSer1163Ala[Ala2365/ | 1 |
| ENSP00000258654.9@Ile635ValAsn747SerLeu825Ser[Gln497GlnGlu433Glu]   | 1 |
| ENSP00000261405.9@Val471IleGly2705ArgPhe2561TyrThr1381AlaGln852Arg  | 1 |
| ENSP00000356954.3@His83Asp[Leu80LeuPro73Pro]                        | 1 |
| ENSP00000353224.8@Gly142Ser                                         | 1 |
| ENSP00000316029.9@Val2376GlySer1227Leu[Thr1867ThrAla2023Ala]        | 1 |
| ENSP00000350716.4@Ser208AlaAsn123AspSer42Gly[Ala129AlaAla66Ala]     | 1 |
| ENSP00000379901.7@Thr185SerSer134Asn                                | 1 |
| ENSP00000485818.2@Trp309ArgVal540LeuAla825ThrArg777Gln[Leu290LeuLe  | 1 |
| ENSP00000356481.3@Ala66Val[His173His]                               | 1 |
| ENSP00000433982.2@Ala1934ValArg1732HisSer1554ProHis1349ArgArg1276C  | 1 |
| ENSP00000234170.9@Val102Ile[Ser931Ser]                              | 1 |
| ENSP00000334113.10@Glu297LysHis292ArgVal247Leu                      | 1 |
| ENSP00000330836.9@Gln21HisPro123Ser                                 | 1 |
| ENSP00000305502.7@Arg96CysPro423SerAsp407HisVal123Ile[Leu685Leu]    | 1 |
| ENSP00000479355.1@Thr238_Glu239insGluPro476ArgArg131His             | 1 |
| ENSP00000394922.5@Ala249ThrAsn322HisLeu317GlnGlu237LysPro219Ser[Le  | 1 |
| ENSP00000367263.8@Gln3003LysPro5390ThrAsn3637SerVal1098Phe[Ser264   | 1 |
| ENSP00000317992.6@Ile300ValGly706Ser[Thr394ThrGlu306GluLeu615Leu]   | 1 |
| ENSP00000333837.7@Cys45Arg                                          | 1 |
| ENSP00000296046.3@Thr171Met                                         | 1 |
| ENSP00000288050.8@Tyr110HisGlu182Lys                                | 1 |
| ENSP00000408146.6@PheAla64LeuValAla65ValAla84GluAlaAla84AspGluLys9E | 1 |
| ENSP00000261741.9@Gln602GluArg921Gln                                | 1 |
| ENSP00000321706.5@Arg1033CysAsp929AsnHis873GlnIle739ThrGlu593ValAl  | 1 |
| ENSP00000348380.8@Ser97LeuLeu346Phe                                 | 1 |
| ENSP00000360305.6@Asn175Ser[Tyr284Tyr]                              | 1 |
| ENSP00000364912.7@Ala970ValLeu1091ProAsp1363GluAsn2360Asp[Tyr173C   | 1 |
| ENSP00000372199.3@Val1791LeuAsp63GluGly1260Ser[Ala2182AlaSer1292Se  | 1 |
| ENSP00000359504.4@Gln265LysAla409GlyThr349Ser                       | 1 |
| ENSP00000496460.1@His471Gln                                         | 1 |

|                                                                      |   |
|----------------------------------------------------------------------|---|
| ENSP00000353769.7@Thr420ProLeu1084LeuMet1146ThrArg581_Ser582del      | 1 |
| ENSP00000354532.9@Gly51Ser[His20HisPro57Pro]                         | 1 |
| ENSP00000364032.2@Ter687Glnext*?Thr665AlaGly604GlyMet577ValLys54Lys  | 1 |
| ENSP00000262077.2@Ala827ThrAsp90AsnAsn402LysIle248Val[Ser938Ser]     | 1 |
| ENSP00000227868.8@Val326Leu[Pro21ProVal286Val]                       | 1 |
| ENSP00000254718.8@Ile184Val[His881HisAla275Ala]                      | 1 |
| ENSP00000356716.7@Ala908ThrSer1626CysAla1887ThrThr2719Ala[Ser1478S   | 1 |
| ENSP00000288050.8@Thr29AlaTyr110HisIle206ValVal375LeuAsn662Lys[Ser65 | 1 |
| ENSP00000290299.6@Lys98Arg[Asn107AsnGly36Gly]                        | 1 |
| ENSP00000254508.6@Val1787MetLeu1752SerArg786LeuAla755ValIle608ValA   | 1 |
| ENSP00000358727.9@Ala140Asp                                          | 1 |
| ENSP00000372199.3@Val1791LeuGly1260Ser[Thr1491ThrLys1146LysLeu179L   | 1 |
| ENSP00000367011.8@Thr296ArgAsn630AspAsn239Ser[Thr559Thr]             | 1 |
| ENSP00000369299.7@Asp155AsnArg242Thr[His100His]                      | 1 |
| ENSP00000416034.6@Ala307Val                                          | 1 |
| ENSP00000430597.5@Val536Glu[Ala623Ala]                               | 1 |
| ENSP00000321988.11@Val223Met[Pro19Pro]                               | 1 |
| ENSP00000355672.3@Gly211Ser                                          | 1 |
| ENSP00000366620.6@Arg231GlnArg453GlnAsn484Asp[Tyr673TyrSer706SerAl   | 1 |
| ENSP00000296424.8@Asn70Ser[Thr182Thr]                                | 1 |
| ENSP00000350961.4@Pro28Thr[Leu43Leu]                                 | 1 |
| ENSP00000380227.6@Arg878Gln[Thr615ThrHis961HisLeu993Leu]             | 1 |
| ENSP00000328062.9@Val901Ile[Ala940Ala]                               | 1 |
| ENSP00000361186.3@Thr129Ala                                          | 1 |
| ENSP00000285379.9@Lys76Glu[Leu188Leu]                                | 1 |
| ENSP00000355541.7@Glu2017GlyAsn1967AspVal1854AlaAsn1694SerAsp957C    | 1 |
| ENSP00000313490.10@Pro19SerPro133SerLeu621Pro[Ser687Ser]             | 1 |
| ENSP00000413572.8@Arg169LysPro6AlaSer434AsnTyr406His[His455His]      | 1 |
| ENSP00000285021.11@Gln939LysAla499ValLeu48PheLeu16Val[Ala627Ala]     | 1 |
| ENSP00000320563.11@Ser1528ProArg1816GlnSer2527AsnSer214ProGly2034    | 1 |
| ENSP00000305892.13@Met86Arg                                          | 1 |
| ENSP00000316029.9@Ser1227LeuVal2376Gly[Thr1867ThrAla2023Ala]         | 1 |
| ENSP00000238379.9@Gly146Glu                                          | 1 |
| ENSP00000221957.8@Val275AlaIle56Val[Phe221PheLeu186LeuSer175SerVal2  | 1 |
| ENSP00000253237.9@Arg319Gln[Arg8Arg]                                 | 1 |
| ENSP00000346196.6@Asp415Asn[Ser156SerPro113Pro]                      | 1 |
| ENSP00000366927.3@Arg107LeuVal253Met[Ile65Ile]                       | 1 |
| ENSP00000425956.6@Pro778LeuAla1090ThrGln1182LysVal1244MetAsp1380C    | 1 |
| ENSP00000433982.2@Arg1732HisSer1554ProHis1349ArgArg1276GlnAla531V;   | 1 |
| ENSP00000307387.7@Ala309ThrAsn550SerVal378Ile[Ser637SerPro845Pro]    | 1 |
| ENSP00000356505.7@Pro454SerHis389GlnLys181ArgArg395Trp[Ala202Ala]    | 1 |
| ENSP00000489631.1@Val368IleMet624ValPhe352Cys                        | 1 |
| ENSP00000443671.5@Gln368ArgArg163TrpArg249His[Gln601GlnPro175Pro]    | 1 |
| ENSP00000246957.9@Arg307Gly[Asp684Asp]                               | 1 |
| ENSP00000362463.4@Glu111Ala[Gly124Gly]                               | 1 |
| ENSP00000272163.8@Ser154Asn[Pro87ProVal39ValGlu10Glu]                | 1 |
| ENSP00000236959.13@Thr116Ser[Gly4Gly]                                | 1 |



|                                                                      |   |
|----------------------------------------------------------------------|---|
| ENSP00000353224.8@Gly142Ser                                          | 1 |
| ENSP00000441691.8@Met441ThrAla859ValPro1147Ser[Thr834Thr]            | 1 |
| ENSP00000382327.7@Gln270ArgLeu232Phelle79LeuVal136Ile                | 1 |
| ENSP00000261741.9@Gln602GluArg921Gln[Ser953SerThr606Thr]             | 1 |
| ENSP00000321706.5@Arg1033CysAsp929AsnAla579GlyGln450GluPro82SerAr    | 1 |
| ENSP00000367263.8@Ile5483ThrLys4169GluSer3724ProGln3003LysGlu2176A   | 1 |
| ENSP00000224949.8@Gln1037ArgGln516HisAla397ValIle328Val[Arg1007ArgP  | 1 |
| ENSP00000312946.10@Met912ValAla1833Prolle2282ValMet2506ThrAsn631S    | 1 |
| ENSP00000379133.3@Cys76TyrArg7Trp[Thr125Thr]                         | 1 |
| ENSP00000274364.10@Asp527GluLys532GluLeu629Phelle724Val[Leu154Leu/   | 1 |
| ENSP00000330836.9@Gln21HisPro123Ser                                  | 1 |
| ENSP00000254508.6@Val1787MetLeu1752SerArg786LeuAla755ValIle608ValA   | 1 |
| ENSP00000257829.7@Tyr461HisAla983Thr[Pro562Pro]                      | 1 |
| ENSP00000489631.1@Val368IleMet624ValPhe352Cys                        | 1 |
| ENSP00000478837.1@Pro199LeuAla7_Alal8delAla7del                      | 1 |
| ENSP00000001008.5@Asn197Lys                                          | 1 |
| ENSP00000367263.8@Ile5483ThrSer3724ProGln3003LysGlu2176AspAsp1785G   | 1 |
| ENSP00000381785.7@Arg306His                                          | 1 |
| ENSP00000263168.3@Asp10Asn                                           | 1 |
| ENSP00000261416.11@Leu62SerLys121Arg                                 | 1 |
| ENSP00000305502.7@Arg96CysPro423SerAsp407HisVal123Ile                | 1 |
| ENSP00000264279.9@Glu228Ala                                          | 1 |
| ENSP00000318883.9@Ile46ArgArg85His[Ser257SerAsn292Asn]               | 1 |
| ENSP00000321706.5@Arg1033CysAsp929AsnIle739ThrGlu593ValAla579GlyTh   | 1 |
| ENSP00000485128.6@Ile274ThrSer203Arg[Pro306Pro]                      | 1 |
| ENSP00000339566.3@Ala18Val[Ser36Ser]                                 | 1 |
| ENSP00000355541.7@Glu2017GlyAsn1967AspVal1854AlaAsn1694SerMet607     | 1 |
| ENSP00000355569.7@Ser78Pro                                           | 1 |
| ENSP00000246043.8@Arg1324LeuSer1199LeuLeu1043His                     | 1 |
| ENSP00000482543.1@Ala35Val                                           | 1 |
| ENSP00000268058.7@Phe645Leu                                          | 1 |
| ENSP00000267884.10@Pro124AlaLys107_Alal108insAlaLeu94LeuArg59ArgLysA | 1 |
| ENSP00000288050.8@Thr29AlaTyr110HisIle206ValVal375LeuArg427CysAsn6E  | 1 |
| ENSP00000433982.2@Arg1732HisArg1584TrpSer1554ProHis1349ArgArg1276G   | 1 |
| ENSP00000258787.11@Gln861ArgMet489Thr[His494HisAsn416Asn]            | 1 |
| ENSP00000313420.6@Ile3434Thr                                         | 1 |
| ENSP00000380227.6@Val359IleArg878Gln[Thr615ThrHis961HisLeu993Leu]    | 1 |
| ENSP00000345719.4@Asp216His[Ala82Ala]                                | 1 |
| ENSP00000390783.6@Lys63Arg                                           | 1 |
| ENSP00000393292.8@Met25ThrPro155Arg[Ala380Ala]                       | 1 |
| ENSP00000354573.6@Met2290ValAla4350ThrSer4670Thr[Ser2311SerArg476G   | 1 |
| ENSP00000483983.4@Asn561AspSer80Asn[Glu385GluAsp126Asp]              | 1 |
| ENSP00000224949.8@Gln1037ArgGln516HisAla397ValIle328Val[Arg1007ArgP  | 1 |
| ENSP00000367263.8@Gln3003LysPro5390ThrAsn3637SerVal1098Phe[Ser264    | 1 |
| ENSP00000357835.9@Gln94Arg[Pro246Pro]                                | 1 |
| ENSP00000481126.4@Lys889ArgAla588Thr[Gly162GlyCys660CysTyr422Tyr]    | 1 |
| ENSP00000216181.10@Ile1626ValVal1366GlySer1163AlaVal834Gly[Ala1143A  | 1 |

|                                                                     |   |
|---------------------------------------------------------------------|---|
| ENSP00000333811.9@Asn13Ser[His82His]                                | 1 |
| ENSP00000221418.8@Gly217Arg                                         | 1 |
| ENSP00000339566.3@Ala18ValAla209GlyPro14Leu[Ser36Ser]               | 1 |
| ENSP00000261396.5@Arg962HisGln406ArgIle294Val[Leu486LeuTyr186Tyr]   | 1 |
| ENSP00000293195.9@Gln123Arg[Ala250Ala]                              | 1 |
| ENSP00000364114.3@Ala169ThrSer164GlyTyr89SerAsp86ValVal265LeuLys25: | 1 |
| ENSP00000261416.11@Leu62SerIle207Val                                | 1 |
| ENSP00000423463.5@Tyr1391HisLys1321AsnAsp807Glu[Thr459ThrLeu402Leu  | 1 |
| ENSP00000413572.8@Arg169LysPro6AlaSer434AsnTyr406His[His455His]     | 1 |
| ENSP00000346634.9@Ala201Val                                         | 1 |
| ENSP00000364076.3@Ala16ThrPhe38LeuHis42TyrTyr48PhePhe121SerLeu219   | 1 |
| ENSP00000258787.11@Gln861ArgMet489ThrVal49Met[His494HisAsn416AsnI   | 1 |
| ENSP00000432523.5@Arg35Gln                                          | 1 |
| ENSP00000345848.4@Asp130Ala                                         | 1 |
| ENSP00000364032.2@Ter687Glnext*?Thr665AlaGly604GlyMet577ValLys54Ly  | 1 |
| ENSP00000261407.8@Ile217Thr[Leu95Leu]                               | 1 |
| ENSP00000316029.9@Val2376GlySer1227Leu[Thr1867ThrAla2023Ala]        | 1 |
| ENSP00000225275.3@Ala332Val                                         | 1 |
| ENSP00000246957.9@Arg307Gly[Asp684Asp]                              | 1 |
| ENSP00000313490.10@Pro19SerPhe481TyrPhe1314CysLeu621Pro[Lys494Lys:  | 1 |
| ENSP00000288532.10@Ala152Thr[Ala8Ala]                               | 1 |
| ENSP00000359531.9@Glu241Asp[Leu242Leu]                              | 1 |
| ENSP00000483688.4@Met34Leu                                          | 1 |
| ENSP00000367263.8@Gln3003LysPro5390ThrAsn3637SerVal1098Phe[Ser264   | 1 |
| ENSP00000357823.7@Glu210AlaGlu67Gly                                 | 1 |
| ENSP00000266070.8@Thr1568AlaSer1541ProPro1220Gln[Gly657GlyAla621Al: | 1 |
| ENSP00000318883.9@Ile46Arg[Ser257SerAsn292Asn]                      | 1 |
| ENSP00000342139.10@Phe19TyrArg36CysMet56ValMet56ValArg184Ser[Pro2   | 1 |
| ENSP00000377298.7@Arg918Cys                                         | 1 |
| ENSP00000355541.7@Glu2017GlyAsn1967AspVal1854AlaAsn1694SerLeu1419   | 1 |
| ENSP00000382327.7@Gln270ArgLeu232Phelle79Leu                        | 1 |
| ENSP00000302111.7@Leu115Phelle174ValLys209Arg[Leu84Leu]             | 1 |
| ENSP00000328570.4@Ala146Thr                                         | 1 |
| ENSP00000264896.7@Met159Val                                         | 1 |
| ENSP00000485128.6@Ile274Thr                                         | 1 |
| ENSP00000357087.1@Gly131Ser                                         | 1 |
| ENSP00000274364.10@Asp527GluLys532GluLeu629PheArg99CysIle724Val[Le  | 1 |
| ENSP00000348510.8@Glu2077LysPhe1959Ser                              | 1 |
| ENSP00000312671.8@Val133LeuAsp569ValVal538Gly[Ala977Ala]            | 1 |
| ENSP00000269305.8@Met237IlePro190LeuPro72Arg                        | 1 |
| ENSP00000387006.7@Arg794GlnSer773Arg[Ala801AlaVal272Val]            | 1 |
| ENSP00000279146.7@Gln228Lys                                         | 1 |
| ENSP00000454303.2@Leu211Phe[Leu369Leu]                              | 1 |
| ENSP00000356505.7@His389GlnLys181ArgArg395Trp[Ala202Ala]            | 1 |
| ENSP00000386609.5@Pro652LeuMet1535ValGlu1033del[Gly714GlyLeu777Le   | 1 |
| ENSP00000359151.8@Ser384Gly                                         | 1 |
| ENSP00000001008.5@Asn197Lys                                         | 1 |

|                                                                      |   |
|----------------------------------------------------------------------|---|
| ENSP00000321988.11@Val223Met                                         | 1 |
| ENSP00000257829.7@Tyr461His[Ser54SerPro562Pro]                       | 1 |
| ENSP00000483983.4@Asn561AspSer80AsnGlu222Lys[Glu385GluAsp126Asp]     | 1 |
| ENSP00000216465.9@Glu32LysMet82ThrAsn133HisGly42Arg                  | 1 |
| ENSP00000288050.8@Tyr110His                                          | 1 |
| ENSP00000224949.8@Gln1037ArgGln516HisAla397ValIle328ValLeu145Val[Ar] | 1 |
| ENSP00000350277.6@Arg2836HisArg2688TrpSer2658ProAla2061ValHis1326A   | 1 |
| ENSP00000249837.7@Ser2870AsnArg2439HisVal2279MetAsn1912HisIle1452'   | 1 |
| ENSP00000397752.6@Ser197Arg                                          | 1 |
| ENSP00000331368.6@Arg68GlnThr304AlaHis359Arg[Leu159Leu]              | 1 |
| ENSP00000264932.10@Tyr629Phe[Pro297ProAla103AlaArg207ArgAsn228Asn    | 1 |
| ENSP00000246957.9@Asp395GluArg307Gly[Asp684Asp]                      | 1 |
| ENSP00000288050.8@Thr29AlaTyr110HisIle206ValVal375LeuLys531GluAsn66  | 1 |
| ENSP00000274364.10@Asp527GluLys532GluLeu629PheIle724Val[Leu154Leu/   | 1 |
| ENSP00000361816.8@Ala858Ser[Ala721AlaLeu1162LeuLeu1690LeuThr1797TI   | 1 |
| ENSP00000370718.8@Gly434SerTyr364HisSer228Pro[Thr462ThrGly244GlyArg  | 1 |
| ENSP00000353224.8@Gly142Ser                                          | 1 |
| ENSP00000367263.8@Ile5483ThrGlu4698LysSer3724ProGln3003LysGlu2176A   | 1 |
| ENSP00000335304.8@Pro204Leu[Gln192GlnGly366Gly]                      | 1 |
| ENSP00000334263.8@Leu26MetSer146AlaArg152SerVal160AlaPro272Ser[Ala   | 1 |
| ENSP00000383743.7@Gln353Glu[Gln52GlnAla208Ala]                       | 1 |
| ENSP00000353099.5@Gln178HisMet171ValAla169ThrLeu162ArgGln125HisVa    | 1 |
| ENSP00000364114.3@Ala169ThrSer164GlyTyr89SerAsp86ValVal265LeuLys25:  | 1 |
| ENSP00000420298.5@Pro71Thr                                           | 1 |
| ENSP00000316029.9@Val2376GlySer1227LeuGlu317Lys[Thr1867ThrAla2023A   | 1 |
| ENSP00000346206.4@Asp697GlyIle393ValVal578IleAla430Val[Pro721ProGly3 | 1 |
| ENSP00000359504.4@Thr349SerAla409Gly                                 | 1 |
| ENSP00000380227.6@Arg878Gln[Thr615ThrHis961HisLeu993Leu]             | 1 |
| ENSP00000266070.8@Thr1568Ala[Gly657GlyArg1894Arg]                    | 1 |
| ENSP00000364032.2@Ter687Glnext*?Thr665AlaGly604GlyMet577ValLys54Ly   | 1 |
| ENSP00000283195.10@Ser748LeuSer1981Thr[Glu2751Glu]                   | 1 |
| ENSP00000286234.5@Asn204SerSer389Asn                                 | 1 |
| ENSP00000317362.7@Thr64Ala[Ala492Ala]                                | 1 |
| ENSP00000216714.7@Ile64ValAsp148Glu                                  | 1 |
| ENSP00000264932.10@Tyr629PheVal657Ile[Pro297ProAla103AlaArg207ArgA:  | 1 |
| ENSP00000413572.8@Arg169LysPro6AlaSer434AsnTyr406His[His455His]      | 1 |
| ENSP00000395473.6@Val411GlyArg337GlnThr312IleLeu278Val               | 1 |
| ENSP00000322991.10@Thr186Arg                                         | 1 |
| ENSP00000339399.9@Ile176Val[Gly323GlyGly18Gly]                       | 1 |
| ENSP00000433982.2@Arg1732HisSer1554ProHis1349ArgArg1276GlnAla531V:   | 1 |
| ENSP00000367263.8@Gln3003LysPro5390ThrAsn3637SerVal1098Phe[Ser264'   | 1 |
| ENSP00000261758.5@Lys95Arg                                           | 1 |
| ENSP00000305918.11@Ala255Val[Leu312LeuPro428Pro]                     | 1 |
| ENSP00000273130.8@Gln277Arg                                          | 1 |
| ENSP00000265641.9@Arg288Gln[Phe417PheGlu321Glu]                      | 1 |
| ENSP00000366005.9@Phe33TyrAla114AspSer129ProGlu176AlaLeu180GlnAsp    | 1 |
| ENSP00000342056.7@Arg218Gln                                          | 1 |

|                                                                     |   |
|---------------------------------------------------------------------|---|
| ENSP00000254508.6@Val1787MetLeu1752SerArg786LeuAla755ValIle608ValA  | 1 |
| ENSP00000306080.8@Ala8SerGly45Glu                                   | 1 |
| ENSP00000246747.8@Val141Ala[His150His]                              | 1 |
| ENSP00000378782.8@Thr195AlaAla158Val                                | 1 |
| ENSP00000358727.9@Ala140Asp                                         | 1 |
| ENSP00000376162.7@Ser342ArgArg290Cys                                | 1 |
| ENSP00000366620.6@Asp151AlaArg453Gln[Tyr673TyrSer706SerAla212AlaAla | 1 |
| ENSP00000266556.7@Ala42ValMet146ValThr165AlaAla169ValAsp72Asn[Cys3  | 1 |
| ENSP00000246957.9@Arg692HisArg307GlySer259LeuArg13Cys[Asp684AspTyr  | 1 |
| ENSP00000288050.8@Tyr110His[Asp753Asp]                              | 1 |
| ENSP00000354681.8@Ser158AsnGln561fs[Ala740AlaTer998Ter]             | 1 |
| ENSP00000478837.1@Pro199LeuAla7_Alal8delAla7del                     | 1 |
| ENSP00000307288.9@Asn144Ser[Ile537Ile]                              | 1 |
| ENSP00000437073.6@Ala958Val[Ala1470AlaThr1385ThrPro850Pro]          | 1 |
| ENSP00000364032.2@Ter687Glnext*?Thr665AlaGly604GlyMet577ValLys54Ly  | 1 |
| ENSP00000433982.2@Arg1732HisSer1554ProHis1349ArgArg1276GlnAla531V;  | 1 |
| ENSP00000254508.6@Val1787MetLeu1752SerArg786LeuAla755ValIle608ValA  | 1 |
| ENSP00000367263.8@Gln3003LysPro5390ThrAsn3637SerVal1098Phe[Thr566   | 1 |
| ENSP00000358727.9@Ala140Asp                                         | 1 |
| ENSP00000419638.1@Ile293ValArg149Gly                                | 1 |
| ENSP00000339399.9@Ile176Val[Gly18Gly]                               | 1 |
| ENSP00000257829.7@Tyr461His[Ser54SerSer307SerPro562Pro]             | 1 |
| ENSP00000316029.9@Ser1227LeuVal2376Gly[Thr1867ThrAla2023Ala]        | 1 |
| ENSP00000273130.8@Val139Ile                                         | 1 |
| ENSP00000288050.8@Tyr110HisIle206Val[Asp753Asp]                     | 1 |
| ENSP00000493519.1@Val253Ile                                         | 1 |
| ENSP00000366005.9@Phe33TyrAla114AspSer129ProGlu176AlaLeu180GlnAsp   | 1 |
| ENSP00000357087.1@Leu34ValGly131Ser                                 | 1 |
| ENSP00000366934.5@Ser58AlaTrp50ArgArg10Trp[Leu111LeuAsp476Asp]      | 1 |
| ENSP00000305675.4@Gln174Glu[Gly178Gly]                              | 1 |
| ENSP00000274364.10@Asp527GluLys532GluLeu629Phelle724Val[Leu154Leu/  | 1 |
| ENSP00000268058.7@Phe645Leu[Ala675Ala]                              | 1 |
| ENSP00000356505.7@Lys181ArgArg395Trp                                | 1 |
| ENSP00000246043.8@Arg1324LeuSer1199LeuLeu1043His                    | 1 |
| ENSP00000243346.9@Ser16Leu[Leu168LeuGln39Gln]                       | 1 |
| ENSP00000364032.2@Ter687Glnext*?Thr665AlaGly604GlyMet577ValLys54Ly  | 1 |
| ENSP00000367263.8@Gln3003LysPro5390ThrAsn3637SerVal1098Phe[Ser264   | 1 |
| ENSP00000265394.9@Ala435ValArg398HisTyr329CysTyr168HisArg25His      | 1 |
| ENSP00000354573.6@Ser4670ThrAla4350Thr[Gln257Gln]                   | 1 |
| ENSP00000258787.11@Gln861ArgMet489Thr[His494HisAsn416Asn]           | 1 |
| ENSP00000227266.9@Ile153Thr                                         | 1 |
| ENSP00000221486.5@Leu202Ser[Thr11ThrGln154GlnSer259Ser]             | 1 |
| ENSP00000266070.8@Thr1568AlaSer1708CysPro1220GlnAla556ThrMet544Tr   | 1 |
| ENSP00000330836.9@Pro123Ser                                         | 1 |
| ENSP00000376162.7@Ser342Arg                                         | 1 |
| ENSP00000316029.9@Ser1227LeuGlu317LysVal2376Gly[Thr1867ThrAla2023A  | 1 |
| ENSP00000355607.8@Asp519Gly[Glu305Glu]                              | 1 |

|                                                                      |   |
|----------------------------------------------------------------------|---|
| ENSP00000408146.6@PheAla64LeuValAla65ValAla84GluAlaAla84AspGluLys9E  | 1 |
| ENSP00000354497.8@Gly233GluPro894Ser[His1005HisCys954Cys]            | 1 |
| ENSP00000371193.8@Lys241ArgAla19AspThr105Met                         | 1 |
| ENSP00000433982.2@Ala1934ValArg1732HisArg1584GlnSer1554ProHis1349/   | 1 |
| ENSP00000311300.7@Gln29ProSer139Gly[Asp175Asp]                       | 1 |
| ENSP00000296130.4@Gly106Ser                                          | 1 |
| ENSP00000338643.6@Asp259Asn                                          | 1 |
| ENSP00000376162.7@Ser342Arg                                          | 1 |
| ENSP00000321988.11@Val223Met[Val54ValThr51Thr]                       | 1 |
| ENSP00000307432.9@Thr396Ala                                          | 1 |
| ENSP00000383743.7@Gln353Glu[Gln52GlnAla208Ala]                       | 1 |
| ENSP00000441691.8@Phe318TyrMet441Thr[Thr834Thr]                      | 1 |
| ENSP00000362463.4@Glu111Ala                                          | 1 |
| ENSP00000418401.6@Val9Leu                                            | 1 |
| ENSP00000224949.8@Gln1037ArgGln516HisAla397ValIle328ValVal621IlePhe1 | 1 |
| ENSP00000316029.9@Ser1227LeuGlu317LysVal2376Gly[Ala2023AlaThr1867T   | 1 |
| ENSP00000302111.7@Ile174ValLys209Arg                                 | 1 |
| ENSP00000364114.3@Ala169ThrSer164GlyTyr89SerAsp86ValVal232IleThr186  | 1 |
| ENSP00000228945.8@Val68Leu[Ala168Ala]                                | 1 |
| ENSP00000328062.9@Val901IleVal323Leu                                 | 1 |
| ENSP00000324100.6@Val125Ile                                          | 1 |
| ENSP00000265394.9@Ala435ValThr348SerArg25His[Thr79ThrGly64Gly]       | 1 |
| ENSP00000254508.6@Val1787MetLeu1752SerArg786LeuAla755ValIle608ValA   | 1 |
| ENSP00000378360.7@Ala185ThrArg551Gln[Thr157ThrVal437Val]             | 1 |
| ENSP00000265641.9@Ala275Thr[Phe417PheGlu321Glu]                      | 1 |
| ENSP00000364934.6@Glu3del                                            | 1 |
| ENSP00000298299.3@Ser65Gly[Ser152Ser]                                | 1 |
| ENSP00000274364.10@Asp527GluLys532GluLeu629Phelle724Val[Leu154Leu/   | 1 |
| ENSP00000296577.8@Tyr172Asp                                          | 1 |
| ENSP00000382327.7@Gln270ArgLeu232Phelle79Leu                         | 1 |
| ENSP00000367263.8@Gln3003LysPro5390ThrAsn3637SerVal1098Phe[Ser264    | 1 |
| ENSP00000221957.8@Val275Alalle56Val[Phe221PheLeu186LeuSer175SerVal2  | 1 |
| ENSP00000433982.2@Arg1732HisSer1554ProHis1349ArgArg1276GlnPro1037    | 1 |

| <b>Gene</b>  | <b>Identified Peptides</b>                               |
|--------------|----------------------------------------------------------|
| ECHS1        | IFEEDPAVGAIVLTGGDK                                       |
| NAT10        | TLHEVSLQESIR                                             |
| MTHFD1       | DVDGLTSINAGR                                             |
| TRIM25       | LQELTPSSGDPGEHDPASTHK                                    |
| LBR          | FNLSQESSYIATQYSLRPR                                      |
| SAMM50       | FYLGGPSTVR                                               |
| FAM241A      | EAAGTEWDPGASPR                                           |
| LGALS8       | SGTPQLSLPFAAR                                            |
| SRP14        | AAAAAAAAAPAAAATAATTAATTAATAAQ                            |
| NOL9         | LLQAQAAGVDWR                                             |
| ATIC         | TVASPGVSVEEAVEQIDIGGVTLR                                 |
| CPPED1       | LADKFIHAGVR                                              |
| LHPP         | GLRPYLLIHDGVR                                            |
| APEX1        | VSYGIGEEEHDQEGR                                          |
| SLC4A1AP     | SLQEEQSRPTTAVSSPGGPAR                                    |
| TRAPPC5,AC0C | VFSVAELQAR                                               |
| ALDH1B1      | LLNLLADLVER                                              |
| SCFD1        | FGQDIISPLLSVR                                            |
| ARL2         | EALELDSIR                                                |
| GLO1         | ATLELTHNWGTEDDATQSYHNGNSDPR KATLELTHNWGTEDDATQSYHNGNSDPR |
| COMMD2       | TLLSELAPSLPSYHNLEWR                                      |
| TMEM43       | EIGHNNPSAMAVESFTATAPFVQIGR                               |
| FBP1         | IYSLNEGYAK                                               |
| PLIN3        | AQEALLQLSQALSLMETVK                                      |
| TAPBPL       | NEVLWHPTLNLPSPQGTVR                                      |
| NDUFA6       | QVTSTASTFVKPIFSR                                         |
| SKAP2        | IYQFTASSPK                                               |
| BCL2L13      | ESDTEVITVEK                                              |
| PML          | VVIQPEALFSIYSK                                           |
| TOR1AIP1     | LQQQHSEQPPLQSPVTTR SVLSSGYQK                             |
| THEMIS2      | WLDLTVVEAK                                               |
| SGPL1        | AFEPYLEILELYSTK                                          |
| PCYOX1       | YGFQFLR                                                  |
| AIP          | EQPGSPEWIQLDK                                            |
| ALDH5A1      | VYGDIIYTPAK                                              |
| PNPT1        | EVGTSDKEILTSR                                            |
| TRAF3IP3     | FLENEHQELQAK                                             |
| MCM7         | FELYFQGPSSSKPR RFELYFQGPSSSKPR                           |
| MAN2B1       | LIQLVNAQQAK                                              |
| BDH2         | QIDQFASEVER                                              |
| PLIN3        | AQEALLQLSQALSLMETVK ESYPHVKTVCDAAEK                      |
| GSTO1        | SQNKEDYDGLKEEFR EDYDGLKEEFRK                             |
| CPPED1       | LADKFIHAGVR FIHAGVRVVFSGHYHR                             |
| PECAM1       | TTAEYQLLVEGVSPR                                          |
| GLO1         | KATLELTHNWGTEDDATQSYHNGNSDPR                             |
| CMPK1        | KNPDSHYGELIEK                                            |

|          |                                                             |
|----------|-------------------------------------------------------------|
| NMI      | EHLPDEFIKDEQNK                                              |
| CYBA     | KKPSEEEAAAAAGGPPGGPQVNPPIVPTDEVV                            |
| HMGA1    | KQPPKEPSEVPTPK                                              |
| SLC16A1  | AAESPDQKDTEGGPKKEESPV                                       |
| SDR39U1  | RTLATGYQYSFPELGAALK                                         |
| GBE1     | LFAYSSWEVLR                                                 |
| SYTL4    | DTVNPLYDETLR                                                |
| GFM1     | GIIDLIEER                                                   |
| DHX16    | FSTFFDGAPVFR                                                |
| NOL9     | LLQAQAAGVDWR                                                |
| MRPL37   | VFHFLVFQLNTTDLDSNEGVK                                       |
| DYNC1LI1 | YGAALIYTSVK                                                 |
| GSTO1    | SQNKEDYDGLKEEFR                                             |
| HEXB     | PGPALWPLPLSVK GILVDTSR                                      |
| MYH9     | DLEAHVDSANK DLEAHVDSANKNRDEAIK                              |
| NCF2     | LYEPVVIPVGR                                                 |
| DUS3L    | FAGAHLGPEGQNLVQEELAAR                                       |
| HEXB     | PGPALWPLPLSVK                                               |
| GBP1     | VQLPTESLQELLDLHR                                            |
| TAPBPL   | NEVLWHPTLNLPLSPQGTVR AVDVVLDCFLVK                           |
| IDH1     | VTYLVHNFEEGGIAMGMYNQDK                                      |
| HAT1     | LMQGFNEDMAIEAQQK                                            |
| DDRK1    | VSIAELAQASNSLITWGR                                          |
| NLE1     | AAVADEAVAR TGKSYLASLR                                       |
| DIDO1    | LAAETGEGEGEPLSR                                             |
| ALDH1B1  | LLNLLADLVER EVFRLGSPWRR                                     |
| CEBPZ    | ASLIEEDEPAEKENSSK                                           |
| FKBP15   | FGAAVLGNHTTR                                                |
| PRKDC    | KEENASVTDSAELQAYPALVVEK EEENASVTDSAELQAYPALVVEK             |
| NUP210   | NPLDLAAYDQEGR NPLDLAAYDQEGRR                                |
| PDLIM1   | TAASGVEASSRPLDHAQPPSSLVIDKESEVYK TAASGVEASSRPLDHAQPPSSLVIDK |
| LRRC8C   | SNTIQSGPEGSLVNSQSLK                                         |
| AIP      | EQPGSPEWQLDK QITPLLLNYCQCK                                  |
| HEXB     | PGPALWPLPLSVK GILVDTSR GILVDTSRHYLPVKIILK                   |
| RPA1     | NIYLMDASGK                                                  |
| MYH9     | DLEAHVDSANK                                                 |
| RNASEH2A | LQDSDTEYSGYPNDPK                                            |
| MYO1G    | DKDGFGLVLFSSHVR IFLQTLDTHHR                                 |
| RETREG2  | DLGEGEGELAPPEDLLGHPQALSR                                    |
| CPVL     | QVGDFHQVIIR                                                 |
| BCL2L13  | LQEQHLSSPQGVQLDR ASQSLDQEILLK                               |
| SCRN2    | SVFKPFIFGVGVAQAPQVLSPTFGAQPDPVR                             |
| HLA-DPA1 | ETVWHLEEFGR                                                 |
| HDHD3    | RLEGILEGLGLR LEGILEGLGLR                                    |
| PECAM1   | TTAEYQLLVEGVPSPR                                            |
| RETREG2  | DLGEGEGELAPPEDLLGHPQALSR                                    |
| GART     | GIQQHKEEAWVIGSVVAR                                          |

|          |                                                                       |
|----------|-----------------------------------------------------------------------|
| QPRT     | YGLLVGGAVSHR                                                          |
| LACTB    | YAMAWGVVEK                                                            |
| CTSG     | NVSPVALPR                                                             |
| PDLIM1   | TAASGVEASSRPLDHAQPPSSSLVIDKESEVYK                                     |
| WDR55    | AHGAPINLLLLVDENVLATGDDTGGIR                                           |
| CBR4     | EHDVQNTFEEMEK                                                         |
| DIDO1    | LAAETGEGEGEPLSR RLAAETGEGEGEPLSR                                      |
| MCM3     | DSKEPFSSVEIQAALSK EPFSSVEIQAALSK                                      |
| NUDCD1   | SFTFVQAGQDLEENMDEDVSEK                                                |
| APEX1    | VSYGIGEEHHDQEGR VCSWNVDGLRAWIKK                                       |
| WDR55    | AHGAPINLLLLVDENVLATGDDTGGIR                                           |
| LRCH1    | VLPQELVDLPLVK                                                         |
| SCLY     | VSGQTEVDDILA AVRPTTR                                                  |
| MYO1G    | IFLQTLDTTHR DKDGFGLVLFSSHVR                                           |
| SUCLA2   | SFQGPVLIGSSHGCVNIEDVAAETPEAIK SFQGPVLIGSSHGCVNIEDVAAETPEAIKEPIDIEGIKK |
| USE1     | QSAEELDLVLQR                                                          |
| LMAN1    | NSLSETVR                                                              |
| MIA2     | NLQTQQASLQSENTHFENENQK                                                |
| NCAPD2   | SIDPGLKEDTLEFLIK                                                      |
| PNPT1    | EVGTSDKEILTSR REVGTSDKEILTSR                                          |
| SDR39U1  | RTLATGYQYSFPELGAALK WNETFQKEVLGSR                                     |
| ERCC2    | ETDAHLANPVL PNEVLQEAVPGSIR                                            |
| NUP210   | NPLDLAAYDQEGR                                                         |
| ZNF22    | SFGQSSTLFQHQK                                                         |
| TRIM25   | LQELTPSSGDPGEHDPASTHK NELKQCIGRLQELTPSSGDPGEHDPASTHK                  |
| SRP14    | AAAAAAAAAPAAAATAATTAATTAATAAQ                                         |
| NOL9     | LLQAQAAGVDWR                                                          |
| MRPL50   | VRDVFDFYINVPIQDR DVDFYINVPIQDR LHQMCRVRDVFDFYINVPIQDR                 |
| PRKDC    | KEENASVTDSAELQAYPALVVEK EENASVTDSAELQAYPALVVEKMLK                     |
| NUP133   | SSFYSLTSSNVSK                                                         |
| TMX4     | SEANDQPPREDGVTR                                                       |
| PML      | VVIQPEALFSIYSK                                                        |
| HEXB     | PGPALWPLPLSVK GILVDTSR RYHGYIFGFYKWHHEPAEFQAR                         |
| DPP3     | LIVQPNTHLEGSVDVQLLEYEASAAGLIR KLIVQPNTHLEGSVDVQLLEYEASAAGLIR          |
| TOR1A    | ITHVALDFWR                                                            |
| HOMER3   | AAQLLDVR LFELSELR                                                     |
| ALDH5A1  | VYGDIIYTPAK RYVYGDIIYTPAK                                             |
| TOR1AIP1 | LQQQHSEQPPLQPSVTR                                                     |
| ARFGAP3  | YFDEPVELR YFDEPVELRSSSFSSWDDSSDSYWKK                                  |
| HEXB     | PGPALWPLPLSVK                                                         |
| DIDO1    | LAAETGEGEGEPLSR                                                       |
| DMAC1    | PATPATPGAPTSPAHR LSQPFESYITAPPGTAAAPAKPATPATPGAPTSPAHR                |
| TRAP1    | DVGEWQHHEFYR                                                          |
| GFM1     | AIYFDGDFGQIVR                                                         |
| HLA-A    | APWIEQEGPEYWDGETR APWIEQEGPEYWDGETR KGGSYSQAASSDSAQGSVDVSLTACKV KGGSY |
| DGKZ     | RPSSVGLPTGK                                                           |
| TRAF3IP3 | FLENEHQELQAK                                                          |



|          |                                                            |
|----------|------------------------------------------------------------|
| DIS3     | SQWVAPSSVVLHDEGQNEEDVEKEEERER EERERMLK                     |
| LMNB1    | CQSLTEDLEFHK                                               |
| COMT     | MVDFAGMK                                                   |
| THRAP3   | DSRPSQAAGDNQGDEVKEQTFSGGTSQDTK PSQAAGDNQGDEVKEQTFSGGTSQDTK |
| MRPL9    | LPAEPITR                                                   |
| SAMM50   | FYLGGSPTSVR QVDVLIDTCQGDGALPNGLDVTFEVTELR                  |
| CEBPZ    | ASLIEEDEPAEKENSSK ASLIEEDEPAEKENSSK                        |
| RPA1     | NIYLMASGK RNIYLMASGK                                       |
| HLA-F    | DYIALNEDLSSWTAADTAAQITQR                                   |
| CPT2     | DGSTAIHFEHSWGDGVAVLR ALEDVFDALGK                           |
| DYNC1L1  | YGAALIYTSVK                                                |
| NNT      | QLTVGVPR                                                   |
| ITGA4    | GIVQFLSK                                                   |
| MAN2B1   | LIQLVNAQQAK                                                |
| NDUFA6   | QVTSTASTFVKPIFSR MAGSGVRQVTSTASTFVKPIFSR QVTSTASTFVK       |
| ZMYM3    | TGSPGPDLLFHEGQQK                                           |
| EIF2A    | NTVLATWQPYSTSK                                             |
| NUP210   | NPLDLAAYDQEGR NPLDLAAYDQEGR                                |
| GFM1     | AIYFDGDFGQIVR LEFSDETFGSNIPKQFVPAVEKVN                     |
| AHNAK    | VDIDVPDVGVQGPDWHLK VEGDLKGPEVDIRGPK IEGEMQFPDVIDIRGPKVIDIK |
| WASHC4   | KLGITPEGQSYLDQFR LGITPEGQSYLDQFR                           |
| DPP3     | LIVQPNTHEGSDVQLLEYEASAAGLIR                                |
| SRP14    | MAYSNLLR AYSNLLR                                           |
| TFRC     | LSEKLDSTDFSTIK LDSTDFSTIK                                  |
| HLA-DPA1 | ETVWHLEEFGR                                                |
| DIDO1    | LAAETGEGEGEPLSR                                            |
| PITRM1   | DPSWIIR                                                    |
| ATP5PO   | SLNDITAR SLNDITARER                                        |
| GEMIN4   | ALFREPDVLR DLAIHILELLCETVSANAETFSPDVWIK                    |
| MRPL50   | DVDFDFYNVPIQDR VRDVFDFYNVPIQDR                             |
| NQO2     | VLIVYAHQEPN NVAVDELSRQGCTVTVSDLYAMNFEPR                    |
| WDFY4    | ATSEDTLNLRR ATSEDTLNLRR                                    |
| IRF2BP2  | DILLQQQQQLGHGGPEAAPR SPPGAAAPAAKPPPLSAK                    |
| EIF3B    | TLLSQEQIK                                                  |
| WDR3     | LITGVSDSELR                                                |
| PARP14   | SEDVQSIEVQVK                                               |
| CYBA     | KKPSEEEAAAAGGPPGQPVNPIPVTEVV                               |
| ACIN1    | EFKEEGEEMPR NLKTEEEEEEEEEDEEEEEGDDEGQK                     |
| TRAP1    | GVVDSEEIPLNSR DVGWQHEEFYR ELRALLLWGCLLR                    |
| HLA-DPB1 | HNYELDEAVTLQR ATPENYVYQLR DLLEER                           |
| PITRM1   | LSVFSTIDAPVAPSDK DPSWIIR                                   |
| SNRNP200 | VDTDLETMDLDQGGEALAPR                                       |
| NAT10    | TLHEVSLQESIR AGPNTSISLK                                    |
| FKBP4    | FEIGEGLDLPYGLER LDLPYGLER FEIGEGLER                        |
| FAM241A  | EAAGTEWDPGASPR LRGGDGER                                    |
| WDFY4    | ATSEDTLNLRR EVKIEDVTPLEETMLK                               |
| PLBD1    | HWDFNIIDKDTSSSR                                            |

|          |                                                                         |
|----------|-------------------------------------------------------------------------|
| GLRX3    | HASSGSFLSSANEHLKEDLNLR HASSGSFLSSANEHLK                                 |
| HEATR1   | NFGAENPDFVFPVLSTAVK                                                     |
| WASHC4   | LGITPEGQSYLDQFR                                                         |
| LY75     | LHLAGFSSVR                                                              |
| TAP2     | LAQLQEGQDLYSR LVQQRLMD                                                  |
| PSMB4    | FQTATVTEK                                                               |
| PCYOX1   | YGFQFLR LVWRYGFQFLRMHMWVEDVLDK                                          |
| EHBP1L1  | HAGPVPVQVPLR                                                            |
| HOMER3   | AAQLLDVR LFELSELR                                                       |
| AHNAK    | VDIDVPDVGQVQPDWHLK VEGDLKGPEVDIRGPK GPKVDIDVPDVGQVQPDWHLK               |
| PLEC     | TSEDNLYLAVLR VPQPEGLR                                                   |
| ALYREF   | QQLSVEELDAQLDAYNAR QQLSVEELDAQLDAYNARMDTS                               |
| SARS     | KLDLEAWFPGSEAFR LDLEAWFPGSEAFR                                          |
| MSH6     | AAAPEASPSGGDAAWSEAGPGRPLAR                                              |
| NCAPD2   | SIDPGLKEDTLEFLIK                                                        |
| CSRP1    | HEEAPGHRPTTNPNASIFAQK                                                   |
| HLA-DRB1 | AVTELGRPVAESWNSQK VRLLEFYFHNQEELLR YFHNQEELLRFDSVGEFR                   |
| GAK      | GDLDISYVTSR                                                             |
| RNF213   | GGSEPGTELQTTEQQAGASASTAVDAVAEPANAVK                                     |
| GAA      | APSPLYSEVFSEEPFGVIVHR YEVPLETPR                                         |
| CORO7    | VAVPLLSSGGQVAVLELQKPGR QLQIFDPR                                         |
| CPPED1   | LADKFIHAGVR FIHAGVR                                                     |
| ATP5PO   | SLNDITAR                                                                |
| PSMD2    | EWQELDDTEK                                                              |
| LRRFIP1  | KALDNSLENDDLSAPGREPGDFNPESR ALDNSLENDDLSAPGREPGDFNPESR                  |
| PSMB3    | FGIQAQLVTTDFQK                                                          |
| F13A1    | AVPPNNSNAAEDDLPTVELQGLVPR RAVPPNNSNAAEDDLPTVELQGLVPR                    |
| TLN1     | LLSDLLPPSTGTFQEAQSR QMALLDQTK TLSHPRQMALLDQTK                           |
| SUPV3L1  | LLNLEGFLSGSQSR                                                          |
| THRAP3   | DSRPSQAAGDNQGDEVKEQTFSGGTSQDTK PSQAAGDNQGDEVK                           |
| SEC23B   | GAIQFVTHYQQSSTQR                                                        |
| APEX1    | VSYGIGEEEHQEGR EAAGEGPALYEDPPDHK KNDKEAAGEGPALYEDPPDHK                  |
| IDH2     | SPNGTIQNILGGTVFR                                                        |
| FMNL1    | FSESTAMGASR                                                             |
| RUNX1    | APDGQDLAVGQAR QAWPGWAPRAAAFASGR RQAWPGWAPRAAAFASGR                      |
| GSTO1    | SQNKEDYDGLKEEFR EDYDGLKEEFRK                                            |
| AHNAK    | VDIDVPDVGQVQPDWHLK AEDPEVDVNLPK VEGDLKGPEVDIRGPK GPEVDIRGPK GPKVDIDVPD' |
| LYRM4    | AQVLALYR                                                                |
| IBA57    | LLTQDEGPALVPGSR LLTQDEGPALVPGSRLGDLWDYHQHR                              |
| XRCC1    | LPAPHTPATAPVPAR RPKLPAPHTPATAPVPAR                                      |
| HEXA     | DFYVVEPLAFEGTPEQK ISYGPDWKDFYVVEPLAFEGTPEQK                             |
| CPT2     | DGSTAIHFEHSWGDGVAVLR                                                    |
| NDUFA6   | QVTSTASTFVKPIFSR                                                        |
| TRAP1    | DVGEWQHEEFYR                                                            |
| THRAP3   | DSRPSQAAGDNQGDEVKEQTFSGGTSQDTK                                          |
| ECHS1    | IFEEDPAVGAIVLTGGDK VLLSCARGPLRPPVR                                      |
| LBR      | FNLSQESSYIATQYSLRPR NDAPHKNTQEKFNLSQESSYIATQYSLR                        |

ECH1 NQSLVNELAFAR LTGSSAQEAASGVALGEAPDHSYESLR  
 PLEC YSELTTLTSQYIK EQLQQEQALLEEIER AGVAAPATQVVQVTLQSVQR QEIQIAMPLADSQAVREQLQ  
 HSP90B1 TETVEEPVEEEAAK TETVEEPVEEEAAKEEESDDEAAVEEEEEEK  
 IQGAP2 VLWLDEIQQAVDEANVDED R VLWLDEIQQAVDEANVDEDRAK VLWLDEIQQAVDEANVDEDRAKQ  
 NOL9 LLQAQAAGVDWR  
 PITRM1 DPSWIIR EAYFSVGLQGIVEKDIETVR  
 CBR4 EHDVQNTFEEMEK  
 HEXB PGPALWPLPLSVK GILVDTSR  
 CPPED1 LADKFIHAGVR TLDAFPAEKESEWKGPFFYFILGADPQFGLIK TLDAFPAEKESEWK  
 GPX1 LAAAAAQSVYAFSAR LAAAAAQSVYAFSARPLAGGEPVSLGSLR  
 NCF2 LYEPVVIPVGR LYEPVVIPVGR LFRPNER  
 PCYOX1 YGFQFLR YGFQFLRMHMMWVEDVLDK  
 TRAF3IP3 FLENEHQELQAK  
 SDHA KHTLSFVDVGTGK HTLSFVDVGTGK  
 MRPS28 TPAGGFASALER TPAGGFASALERHSELLQKVEPLQK  
 CYBRD1 SDSELNNEVAAR  
 ICAM1 EVTVNVLSR  
 ARHGDIASIQEIQELDKYDESLR SIQEIQELDKYDESLR  
 GSTO1 SQNKEDYDGLKEEFR EDYDGLKEEFR EDYDGLKEEFR  
 HEXB PGPALWPLPLSVK WHHEPAEFQAR  
 NOL9 LLQAQAAGVDWR MADSGLLLKWGSCR  
 CCDC93 TALLAGLSATEK TALLAGLSATEKADAHEEDEL  
 AHNAK AEDPEVDVNLPK EADVNLPK VDIVPVDVGVQGPDWHLK VSVGATDLSLEASESGSIK GPSLQGD LAVS  
 IMPA2 LQVSGETDLSK  
 SLC12A7 DGTSHLIQSAGLGGLK  
 GLRX3 LVGAHAPELTK LVGAHAPELTKKVQR  
 GLO1 ATLELTHNWGTEDDATQSYHNGNSDPR  
 DIS3 SQWVAPSSVVLHDEGQNEEDVEKEEERER  
 PLEC AGVAAPATQVVQVTLQSVQR YSELTTLTSQYIK EQLQQEQALLEEIER WQEYRELVLLLQWMQHHT/  
 NDUFS3 TYTDELTPIESAVSLFK  
 AHCY DRPLNMILDDGGDLTNIHTK  
 SORL1 TNVYISSAGTR EENTCLRNQYR  
 HLA-DPB1 ATPENYVYQLR YIYNREELVR FLERYIYNREELVR  
 PSMD2 EWQELDDTEK EWQELDDTEKVQR  
 WDFY4 ATSEDTLNL IPTIIGILACQLRGHFSTQDLLR  
 RRPB1 EHTLHLEAELEK QKLTAEFEEAQTSAQLLQEELEK  
 NCF2 LYEPVVIPVGR  
 MACF1 AALLDQALSAR KAALLDQALSAR QHADHLALNEEIVNR ALEEDIENHATDVHQAVK IGQSLSSLSI  
 XRCC1 LPAPHTPATAPVPAR LPSRRYLMAGPGSSSEEDASHGGSGDEAPK  
 GLRX3 HASSGSFLSSANEHLK HASSGSFLSSANEHLKEDLNL  
 SVIL LFLSSSSGDFAAATEFVYPAR  
 FLII LAGASPATVAAAAAGSGPK  
 IDH1 LVSGWVKPIIIGHHAYGDQYR PIIIGHHAYGDQYR NIPRLVSGWVKPIIIGHHAYGDQYR  
 THEMIS2 WDLTVVEAK  
 GSTM1 IFEPNCLDAFPNLK IFEPNCLDAFPNLKDFISR  
 PLEC YSELTTLTSQYIK EQLQQEQALLEEIER AGVAAPATQVVQVTLQSVQR VPVDVAYRHGYFDEEMNR  
 SPOUT1 TEEAILISLAALQPGLTQAGAR

|          |                                                                        |
|----------|------------------------------------------------------------------------|
| ARHGAP1  | NPEQEPIPIVFR                                                           |
| CORO7    | QLQIFDPR                                                               |
| TOR1AIP1 | TPQEWAPHTAR TTRSSSQYIESFWQSSQSQNFTAHDKQR                               |
| DGUOK    | NLFENGSLSDIEWHIYR YIFAKNLFENGSLSDIEWHIYRDWHSFLLWEFASR                  |
| PITRM1   | EAYFSVGLQGIVEKDIETVR EAYFSVGLQGIVEK GLCVLRRRLSGGHAHHR                  |
| PDPR     | LYHQLEQETGIQTGYTR NSASAAEARSMALPTQAQVVICGGGITGTSVAYHLSK                |
| ASMTL    | HDPIPAADTFEDLSDVEGGGSEPTQR HDPIPAADTFEDLSDVEGGGSEPTQRDAGSR             |
| CYB5R1   | RPQVTLLDPSEK SRRPQVTLLDPSEK PQVTLLDPSEKYLLR                            |
| APPL1    | LIAASSRPNQASSEGGQFVVLSSSQSEESDLGGGGK                                   |
| NRAS     | LVVVGADGVGK                                                            |
| LY75     | TPDWYNPER                                                              |
| HLA-DRB5 | AVTELGRPVAESWNSQK PVAESWNSQK                                           |
| PNPT1    | EVGTSDKELTSR EVGTSDK                                                   |
| TAP2     | LAQLQEGQDLYSR LVQQRLMD                                                 |
| AHNAK    | VDIDVPDVGQGPDWHLK VEGDLKGPEVDIRGPK GPKVIDIDVPDVGQGPDWHLK IEGEMQFPDV    |
| WASHC4   | KLGITPEGQSYLDQFR LGITPEGQSYLDQFR                                       |
| TOR1A    | ITHVALDFWR                                                             |
| ESD      | AFSEYLGTDQSK KAFSEYLGTDQSK                                             |
| MUT      | YQLEKEDTVEVLAIANTSVR EVAQQAVDADVHAVGVSTLAAGHK EDTVEVLAIANTSVR EVAQQAVD |
| MAN2B1   | LIQLVNAQQAK                                                            |
| MYO1C    | NVLDTSWPTPPPALR                                                        |
| POLE4    | EEVVPAGEAAASQPQAPTSVPGAR AAAAAAGSGTPREEVVPAGEAAASQPQAPTSVPGARLSR       |
| HOMER3   | AAQLLDVR LFELSELR AEVGRAAQLLDVR                                        |
| DDX11    | DFASIVLLDQR                                                            |
| SLC37A2  | ELGGVDNAFLVAYAIGMFISGVFGER                                             |
| GIN51    | WEYGSILPNALR                                                           |
| MYH9     | DLEAHVDSANK DLGEELEALKTELEDTLSTAAQQELRAK LEMDLKDLEAHVDSANK             |
| RRBP1    | EHTLHLEAELEK LTAEFEEAQTSAQLLQEELEKLR                                   |
| TRMT10C  | NESTRPSEELELDKWK                                                       |
| GMPPB    | INAGMYILSPAVLR                                                         |
| PITRM1   | LSVFSTIDAPVAPSDK DPSWIIR GLCVLRRRLSGGHAHHR                             |
| CKAP4    | LTLQALTEK                                                              |
| MCM4     | FDLIFLMLDPQDEAYDRR                                                     |
| CYP20A1  | LTPVSAQFQDIEGK QHINPNKTLDPFETMLKSLLR                                   |
| RARS     | IYDALDISLIER IYDALDISLIERGESFYQDRMNDIVK                                |
| PKM      | IENHEGVWR                                                              |
| LRPAP1   | SLNVILAK                                                               |
| WDFY4    | ATSEDTLNLR                                                             |
| VPS11    | DLHDQFQHQLR RDLHDQFQHQLR RDLHDQFQHQLRCSNDSFSVIADYFGR                   |
| TFRC     | LDSTDFSTIK LSEKLDSTDFSTIK KLSEKLDSTDFSTIK                              |
| GEMIN4   | FLGQILTAFPALR ALFREPDVLR                                               |
| TOR1A    | ITHVALDFWR ITHVALDFWRSGKQR                                             |
| SWAP70   | EQALQEAMEQLEEELELER EQALQEAMEQLEEELELERK                               |
| HEXB     | PGPALWPLPLSVK GILVDTSR FSHRGILVDTSR                                    |
| EHD4     | SISIIDSPGILSGEK SISIIDSPGILSGEKQRISR                                   |
| SORBS3   | SPADPTDLGGQTSR                                                         |
| HLA-A    | APWIEQERPEYWDQETR                                                      |

MTHFD1 DVDGLTSINAGR DAIKPNLMQTLEGTPVHVHAGPFANIAHGNSSIIADQIALK  
 HEATR1 NFGAENPDFVPVLSTAVK AGALMMPLVDQLENR  
 CYFIP1 YLTLDSDAMFR  
 TAP2 LAQLQEGQDLYSR  
 TOR1AIP1 SIQEAPVSEDLVIR  
 NLE1 AA AVADEAVAR LLVSGSNDSTLKVWDVKAQK  
 MRPL28 LPGYYLR  
 WASHC4 LGITPEGQSYLDQFR KLGITPEGQSYLDQFR  
 RBM19 NLPAGTLAAELQETFGHFGSLGR  
 EIF2A NTVLATWQPYSTSK  
 ARHGAP45 AEEEEQAGSAPGAGGTATK ECVLHDDLLEARRPR  
 FDXR DVTVPELR EAYHAVVLSYGAEDHR DVTVPELREAYHAVVLSYGAEDHR  
 NUP210 NPLDLAAYDQEGR  
 BCL2L13 ASQSLDQEILLK LQEQHLSSPQGVQLDR ESDTEVITVEK  
 RANGAP1 TQVAGGQLSLK  
 SERPINB10 TYFGAEPQSVNFVEASDQIR TYFGAEPQSVNFVEASDQIRK DALATSINQFALELSK MDALATSINQFAI  
 MTRR GQEEISGALPVASPLR  
 ECH1 LTGSSAQEAASGVALGEAPDHSYESLR  
 KPNA3 SGILPILVR  
 MRPL19 GLGATFVLR  
 HLA-DRB5 YFYNQEEYVR  
 PDCD6IP TMQGSEVVSVLK  
 TLN1 LLSDLLPPSTGTFQEAQSR RLLSDLLPPSTGTFQEAQSR  
 SLC16A1 AAESPDKDTEGGPKKEESPV DTEGGPKKEESPV  
 AHNAK VDIDVPDVGQGPDWHLK VDIDVPDVGQGPDWHLKMPK  
 TRPM2 LASLEEQAQTAR ALHWIVRTLK KTEEPGDSYHMNAR  
 TBCD LLSMTLSPDLHTR  
 NUDT6 FIAPAASLGFR SVLSIQQQHTNPGAFGK  
 ATP5MPL NVWIPMKPYTK  
 ETFA GISFDAAATSGGSASSEK  
 GADD45GIP1 YGAASGVVPGSLWPSAEQLR  
 MIA2 EHSPYGPSPLGWPSSETR  
 NID1 SNGAYNIFANDRESIENLAK  
 ITGA4 GIVQFLSK GIVQFLSKTDK  
 PITRM1 DPSWIIR YHEKQAHVEATKLLK  
 HLA-DRB5 RVHPEVTVYPAK VHPEVTVYPAK SGEVYTCQVEHPSVMSPLTVEWR DILED RR FLWQGKYKCHFFNG  
 CTSC GTDECAIESVAVAATPIPK VGTASENVYVNTAHLK RGTDECAIESVAVAATPIPK  
 PARP10 EEEEEGPQEPEEEATPGHEEEEPVAPSTVAPR LQGSELSLVPHYDVLEPEELAENTSGGDHPSTQGPR  
 HLA-DRB1 AVTELGRPVAESWNSQKDLEDR PVAESWNSQKDLEDR  
 RRBP1 EHTLHLEAELEK QKLTAEFEEAQTSAQLLQEELEK EKLHSLTQAKEESEK  
 MAN2B1 LIQLVNAQQAK  
 ARFGAP3 YFDEPVELR  
 PRRC2A SSDASTAQPLESQPLPASQTPASNQPK ELPAPPAPPASAPTPEK  
 COMT MVDFAGMK  
 EBNA1BP2 GFSDKLDLFLEGDQKPLAQHK  
 TRAP1 DVGEWQHEEFYR  
 PLPBP IGSMIFGER IGSMIFGERDYSKK

|          |                                                                              |
|----------|------------------------------------------------------------------------------|
| CTSD     | YSQVVPVAVTEGPIPEVLK                                                          |
| FDXR     | DVTVPELR                                                                     |
| GZMA     | LLQLTEK                                                                      |
| ATAD3A   | ATVEQEMELR                                                                   |
| H6PD     | LFGSPLSDYYAYSPVQER                                                           |
| HLA-DPA1 | ETVWHLEEFGR KETVWHLEEFGR ALSLAFLLSLRGAGAIKADHVSTYAMFVQTHR                    |
| SULT1A1  | SLPEETVDFMVQHTSFK                                                            |
| MRM3     | VVFPSEEVVEQK                                                                 |
| HLA-C    | YTCHVQHEGLPEPLTLR THVTHHPVSDHEATLR LLRGYDQYAYDGK EAEQWRAYLEGLCVEWLR          |
| SRPRB    | LADGGGAGGTFQPYLDTLR RLADGGGAGGTFQPYLDTLR                                     |
| MGMT     | LGRPGLGGSSGLAGAWLK GNPVPILVPCR                                               |
| DIDO1    | LAAETGEGEGEPLSR SEEKAAATAASKK                                                |
| PARP14   | SEDVQSIEVQVK                                                                 |
| NMI      | EHLPDEFIKDEQNK MEADKDDTQQILKEHLPDEFIK                                        |
| CTSW     | VAGAISPIKDQK                                                                 |
| CDKN2AIP | ASEAEAPDKHGSSFVSLK                                                           |
| SPTA1    | SEQVHGVINLGNLIER                                                             |
| COG3     | VSDLAATAYK YTLSQQPWAQPAKVSCLAATAYKTIK                                        |
| VWF      | IALLMASQEPQR IALLMASQEPQRMSR VTGCPPFDEHKCLAER GKIMKIPGTCCDTCEEPECNDITA       |
| CTGF     | GLFCDFGSPANR                                                                 |
| TFRC     | LDSTDFTSTIK KLSEKLDSTDFTSTIK                                                 |
| TLN1     | LLSDLLPPSTGTFQEAQSR RLLSDLLPPSTGTFQEAQSR                                     |
| TUSC1    | LPGEGGDGTPAEAR                                                               |
| TMEM106B | SAYVNYDVQK SAYVNYDVQKR YIGVKSAYVNYDVQKR                                      |
| VARS2    | ALQATYQLTK ALQATYQLTKAR MSKSLGNVLDPRDIISGVEMQLLQEK                           |
| FAM129A  | TKPPLVPGTILYEELSQFSEDIKK                                                     |
| PLEC     | YSELTTLSQYIK AGVAAPATQVVQVTLQSVQR EQLQQEQALLEEIER PKVQSGSESVIQEYVDLRTR       |
| CEBPZ    | ASLIEEDEPAEKENSSK ASLIEEDEPAEKENSSK                                          |
| DHRX     | LLAEGSHVTANVVDPGVVNTDLYK YLYNKKETK                                           |
| GLRX3    | HASSGSFLLSANEHLK HASSGSFLLSANEHLKEDLNL VQRHASSGSFLLSANEHLK                   |
| ASCC2    | SIFLTLR                                                                      |
| LENG9    | LAGVTEEALKPTAATR                                                             |
| GP6      | AVQRPLPPLPPLPQTR                                                             |
| AHNAK    | VDIDVPDVGQGPDWHLK IEGEMQFPDVIDR                                              |
| NOC2L    | MVVVWSTGEESLR                                                                |
| MRPL12   | REALAGAPLDNAPK EALAGAPLDNAPK                                                 |
| CPA3     | AIFMDCGIHAR                                                                  |
| P DPR    | LYHQLEQETGIQTGYTR DAVVSSADVALALASAASQNGVQIYDR HLTIEQKMADYSNKLYHQLEQETGI      |
| HLA-DPB1 | ATPENYVYQLR YIYNREELVR AVTELGRPDEGSTGTARR FLERYIYNREELVR YIYNREELVRFDSVDVGEF |
| RBM19    | NLPAGTLAAELQETFGHFGSLGR                                                      |
| GEMIN4   | ALFREPDVLR FLGQILTAFPALR                                                     |
| CYP20A1  | LTPVSAQFQDIEGK TLDPFETMLK                                                    |
| PDLIM1   | TAASGVEASSRPLDHAQPPSSLVIDKESEVYK TAASGVEASSRPLDHAQPPSSLVIDK                  |
| SPEN     | LGEPAGESVENQEVQSK                                                            |
| URB1     | WVFGLLR EEVYDVVEGYIK WVFGLLRQGIRDK                                           |
| GBP1     | LQDEELDPEFVQK                                                                |
| SEC23B   | GAIQFVTHYQQSSTQR GAIQFVTHYQQSSTQRRIIR                                        |

SCAF1 AARPPPAASATPTAQLPQPPAPR  
PNP LTQAQIFDYSEIPNFPR  
TAP2 LAQLQEGQDLYSR LAQLQEGQDLYSRLVQQR  
NUP153 KPAFNLSAFGTLSPSLGNSSVLK KCSTGYEKNMTPGQNR  
PDHX LSVNDFIIK  
MYBBP1A ALVDVLSEVSK  
PRRC2C TLSTPQEER  
PDPR LYHQLEQETGIQTGYTR  
ATP5PO SLNDITAR VKSLNDITAR  
NUP210 NPLLDLAAYDQEGR NPLLDLAAYDQEGRR LPPGSEHCSGVR  
GSTO1 SQNKEDYDGLKEEFR EDYDGLK  
URB1 WVFGLLR  
DIS3 SQWVAPSSVVLHDEGQNEEDVEKEEERER SQWVAPSSVVLHDEGQNEEDVEKEEER  
TRIM22 LTGSSVEMQLQDVIDVMK ENQEAEKLEDDIR ENQEAEKLEDDIRQER  
CHID1 MVWDSQVSEHFFEYK DHRPRMVWDSQVSEHFFEYK  
AP3B1 QLIVPNEK  
SULT1A1 SLPEETVDFMVQHTSFK  
IBA57 LLTQDEGPALVPGSR  
H6PD LFGSPLSDYYAYSPVQER DQNRKALDGLWNQHHVER  
BDH2 QIDQFASEVER KQIDQFASEVER  
DMAC1 PATPATPGAPTSPAHR  
ITGA4 GIVQFLSK  
WASHC4 LGITPEGQSYLDQFR  
TP53RK DYIQSAMETEK DYIQSAMETEKTPQGLSNLAK  
CA2 ILNNGHAFNVEFDDSQDEAVLK  
HEATR1 NFGAENPDFVPVLSTAVK PFADTLDQVNISK YMLPHLVSIIHHVTGEETEGMDGQIYKR  
PFAS LSFAPSSAEVEAIALATLHDR  
NLE1 AAAVADEAVAR LLVSGSNDSTLKVWDVKAQK  
XPC KDPSLPVASSSSSSK DPSLPVASSSSSSKR  
WDFY4 ATSEDTLNR TYPQDPAWQAPEFLQTLAIAAFPLGAQKGVGAESTR  
TMEM208 AAFSEDGALR  
TLN1 LLSDLLPPSTGTFQEAQSR  
HDHD3 LEGILEGLGLR  
PLIN3 AQEALLQLSQALSLMETVK  
GRWD1 QEPFLLSGDDGALK  
NDUFV3 LEAEGEAMEDAAAPGNDR  
ALDH1B1 LLNLLADLVER EAGFPPGVVNIITGYGPTAGAAIAQHMDVDK  
RNF213 TTDNFDDILK VLQEQHQLSSR FGIVLSAVITKSWPRTTDNFDDILK  
PLEC AGVAAPATQVVQVTLQSVQR YSELTTLTSQYIK EQLQQEQALLEEIER  
PDCD6IP TMQGSEVSVLK  
NCF2 LYEPVIVPGR LSYWPRDSNELVPLESDSMK LEQTKLSYWPR LEQTKLSYWPRDSNELVPLESDSMK E:  
CPT2 ALEDVFDALGK DGSTAIHFEHSWGDGVAVLR EFLQCVEKALEDVFDALGK  
XRCC1 LPAPHTPATAPVPAR RYLMAGPGSSSEDEASHSGSGDEAPKLPQK  
TRAP1 DVGEWQHHEFYR DVGEWQHHEFYRYVAQAHDK  
GLO1 ATLELTHNWGTEDDATQSYHNGNSDPR KATLELTHNWGTEDDATQSYHNGNSDPR  
LBR FNLSQESSYIATQYSLRPR  
ATIC TVASPGVSVEEAVEQIDIGGVTLR

|          |                                                                        |
|----------|------------------------------------------------------------------------|
| TFRC     | LDSTDFTSTIK LDSTDFTSTIKLLNENSYPREAGSQK                                 |
| ITGAM    | QNTGTWESNANVK                                                          |
| SDR39U1  | RTLATGYQYSFPELGAALK                                                    |
| RBM19    | NLPAGTLAAELQETFGHFGSLGR                                                |
| GEMIN4   | FLGQILTAFPALR ALFREPDLVLR                                              |
| AHNAK    | VSMPGVDLNLK VDIDTPDINIEGPEGK VDIDVPDVGQGPDWHLK ADIDVSGPSVDTDAPDLDIEGPI |
| PITRM1   | EAYFSVGLQGIVEKDIETVR DPSWIIR EAYFSVGLQGIVEK                            |
| STAB1    | TRPGELMVGEDDAR VGVVSLGAR                                               |
| APIP     | IQPEDMFVYDINEK SGCDAWEGDCCSR                                           |
| IQGAP2   | RQTFIDNTDSVVK QTFIDNTDSVVK VLWLDEIQQAVDEANVDEDRAK                      |
| GLRX3    | HASSGSFLSSANEHLK HASSGSFLSSANEHLKEDLNLK                                |
| NUP210   | NPLLDLAAYDQEGR                                                         |
| NAT10    | TLHEVSLQESIR                                                           |
| CPT2     | ALEDVFDALLEGK DGSTAIHFEHSWGDGVAVLR ALEDVFDALLEGKSIK                    |
| GPX1     | LAAAAAQSVYAFSAR LAAAAAQSVYAFSARPLAGGEPVSLGSLR                          |
| FKBP4    | FEIGEKEKLDLPYGLER LDLPYGLER LDLPYGLERAIQRMEK                           |
| AHNAK    | VDIDTPDINIEGPEGK VDIDVPDVGQGPDWHLK VSMPGVDLNLK ADIDVSGPSVDTDAPDLDIEGPI |
| HSDL2    | LQLQPKPHSGAVEETFR                                                      |
| CAPZA1   | ADFDDRVSNEEK                                                           |
| HEXB     | PGPALWPLPLSVK RYHGYIFGFYKWHHEPAEFQAR                                   |
| ASCC2    | SIFLTFLR                                                               |
| NOP58    | LSELLPAEVEAEVK                                                         |
| BCL2L13  | LQEQHLSSPQGVQLDR ASQSLDQEILLK                                          |
| GEMIN4   | ALFREPDLVLR                                                            |
| TXNRD2   | TTGKEDTGTFTVLWAIGR RLPDGQLQVTWEDR                                      |
| HIST1H1C | SETAPAAPAAAPPAEKVPVK SETAPAAPAAAPPAEKVPVKK                             |
| HEATR1   | NFGAENPDFVPVLSTAVK AGALMMPLVDQLENRLGGEEK                               |
| IRF2BP2  | SPPGAAAPAAAKPPPLSAK                                                    |
| RRBP1    | EHTLHLEAELEK                                                           |
| NDUFA6   | QVTSTASTFVKPIFSR QVTSTASTFVK                                           |
| PML      | VVIQPEALFSIYSK FRVVIQPEALFSIYSK                                        |
| SRP14    | AAAAAAAAAAPAAAATAATTAATTAATAAQ                                         |
| PDPR     | LYHQLEQETGIQTGYTR                                                      |
| PLEC     | AGVAAPATQVVQVTLQSVQR EQLQQEQALLEEIER YSELTTLSQYIK                      |
| MYO1G    | IFLQTLDTTHR DKDGFAGVLFSSHVR                                            |
| PRKDC    | KEENASVTDSAELQAYPALVVEK                                                |
| ITGA4    | GIVQFLSK                                                               |
| TOR1A    | ITHVALDFWR AMFIFLSNAGAERITHVALDFWR                                     |
| SCFD1    | FGQDIISPLLSVR VLIYDRFGQDIISPLLSVRELK                                   |
| TOR1AIP1 | SVLSSGYQK LQQQHSEQPPLQSPVTR                                            |
| MACF1    | TLLPEDTQKLDNFLGEVR TLLPEDTQK LETMNQCWESVLQKTEER                        |
| BIN2     | FEQSANNFYQQQAEGHK                                                      |
| PITRM1   | DPSWIIR                                                                |
| AHNAK    | VDIDVPDVGQGPDWHLK                                                      |
| LHPP     | GLRPYLLIHDGVR                                                          |
| VPS11    | DLHDQFQHQLR                                                            |
| MYH9     | DLEAHVDSANK DLEAHVDSANKNRDEAIK KLEMDLKDLEAHVDSANK                      |



PSMD13 DVPGFLQQSQSSGPGQPAVWHR  
ECH1 NQSLVNELAFTAR  
HIST1H1C SETAPAAPAAAPLAEK SETAPAAPAAAPLAEKVPVK  
NUP133 SSFYSLTSSNVSK  
FDXR EAYHAVVLSYGAEDHR DVTVPELR  
HLA-DRB5 YFYHQEEYVR HECHFFNGTERVFLDR  
HEXB GILVDTSR PGPALWPLPLSVK GILVDTSRHLYLPVK  
LY75-CD302 TPDWYNPER  
NLE1 AAAVADEAVAR MAAVADEAVARDVQR LLVSGSNDSTLKVWDVKAQK  
THRAP3 DSRPSQAAGDNQGDEVKEQTFSGGTSQDTK DSRPSQAAGDNQGDEVK  
HLA-DQA2 KETVWQLPLFR ETVWQLPLFR  
MYO1G DKDGFGLVLFSSHVR IFLQTLDTTHHR  
C11orf98 HQVVGAVIDQGLITR  
ANP32B SLDLFNCEVTNLNAYR  
TAP2 LAQLQEGQDLYSR  
LPCAT3 LVQGELTDIPGK  
TLN1 LLSDLLPPSTGTFQEAQSR  
MPO NQINVLTSEVDASMVYGSEEPLAR  
TRAP1 DVGEWQHEEFYR  
PFAS IGVGGGAASSVQVQGDNTSDLDYGAVQR IGVGGGAASSVQVQGDNTSDLDYGAVQRGDPEMEQK  
COQ5 AQQNLSWEEITK AQQNLSWEEITKEYQNEEDSLGSSR QLRAQQNLSWEEITK  
GTF2B AVDLDLVPGR  
PSMB3 FGIQAQLVTTDFQK RFGIQAQLVTTDFQK RFGIQAQLVTTDFQKIFPMGDR  
AHNAK VDIDVPDVGVQGPDWHLK VSVGATDLSLEASESGIKLPK CPKVSVGATDLSLEASESGIK  
MRPL9 LPAEPITR  
DIDO1 LAAETGEGEGEPLSR AELFQQEQPADK  
BCL2L13 ASQSLDQEILLK LQEQHLSSPQGVQLDR  
LGALS8 SGTPQLSLPFAAR  
NUMA1 EVACLETIVR  
HEATR1 NFGAENPDPFVPLSTAVK AGALMMPLVDQLENRLGGEEK PFADTLDQVNISK  
SDR39U1 RTLATGYQYSFPELGAALK AIMLLEGQKVIPRR  
MGMT LGRPGLGGSSGLAGAWLK GNPVPILVPCHR LGRPGLGGSSGLAGAWLKAGATSGSPPAGR  
GLRX5 LGIHSTLLDEK  
SCARB2 EIIEAVLK  
TXNRD2 EATSVPHIYAIGDVVEGRPELTPTAIMAGR  
DUSP23 LRPSSIETYEQEK  
IQGAP2 QTFIDNTDSVVK VLWLDEIQQAVDEANVDEDR VLWLDEIQQAVDEANVDEDR AK IYDVEQTCYK ESS  
GTF3C1 GSTESFGAANISQAAR  
EHBP1L1 HAGPVPVQVPLR  
TP53 VAPAPAAPTPAAPAPAPSWPLSSSVPSQK MPEAAPR  
CWC22 YTSKDVPSEQNNYSR SEKHRDQNSR  
AIP EQPGSPEWIQLDK NLQMKEQPGSPEWIQLDK  
AP5B1 VGAGLGGGLFTDK  
NCF2 LYEPVVIPVGR  
WDR81 LVAGEDDLEQATEALDSISLAGK  
DBT LGSVGLSTTDLTGGTFTLSNIGSIGGTFK  
FKBP4 FEIGEGEKLDLPYGLER LDLPYGLER LDLPYGLERAIQR

SULT1A1 SLPEETVDFMVQHTSFK SLPEETVDFMVQHTSFKEMKK  
NAT10 TLHEVSLQESIR  
BIN2 AQTVFEDLNQK LLEELPILYNSR  
GSTZ1 TVPINLIK IDGITIHQSLAIIIEYLEETRPTPR IALALKGIDYK  
PDPR LYHQLEQETGIQTGYTR  
PITRM1 DPSWIIR EAYFSVGLQGIVEKDIETVR EAYFSVGLQGIVEK PDDKYHEKQAHVEATK  
PLEC AGVAAPATQVVQVTLQSVQR YSELTTLTSQYIK LAQGHHTVDELAWR EQLQQEQALLEEIER  
VPS13C GEPLHIVNSSNVTDEPLLK  
HTATIP2 GHSVPVVTVVR  
SERPIN8 DGDIIHQGFQSLSEVNR MEPRFCADHPFLFFIRR  
SDHA KHTLSFVDVGTGK HTLSFVDVGTGK  
TRAP1 GVV DSEEIPLNLSR DVG EWQHEEFYR  
PDPR LYHQLEQETGIQTGYTR  
IQGAP2 RQTFIDNTDSVVK QTFIDNTDSVVK VLWLDEIQQAVDEANVDEDRAK VLWLDEIQQAVDEANVDEDI  
SPTAN1 GNAMVEEGHFASEDVK  
ASMTL HDPIPAADTFEDLS DVEGGGSEPTQR  
TFRC LDSTDFTSTIK  
AHNAK VDIDVPDVGVQGPDWHLK VDIDVPDVNIK VDIDTPDINIEGPEGK ADIDVSGPSVDTDAPDL DIEGPE  
DLST LTVAPPLAEPGAGK PVS AVKLT VAPPLAEPGAGK  
HLA-F DYIALNEDLSSWTAADTAAQITQR  
TRAF3IP3 FLENEHQELQAK  
HLA-DRB1 AVTELGRPVAESWNSQK PVAESWNSQK AEVD TYCR WFRNGQEEK AEVD TYCR NYGAGESFTVQR  
HLA-DRB5 YFYNQEEYVR  
CD200 EQLYTTASLK  
TLN1 LLDLLPSTGTGFQEAQSR  
TAP1 SGAHSFISGLPQGYDTEVGEAGSQLSGGQR  
GBP1 VQLPTESLQELLDLHR  
ITGA4 GIVQFLSK VCALEQQKSAMQTLKGIVQFLSK  
DIDO1 LAAETGEGEGEPLSR  
TAP2 ALYLLIR LVQQRLMD  
RANBP2 LFSTQYGK  
DEPTOR TVNNLILTGPR  
PRCP VDHF GFNAVK  
APEX1 VSYGIGEEEHQEGR EGYSGVGLLSRQCPLKVSYGIGEEEHQEGR  
SDHA KHTLSFVDVGTGK HTLSFVDVGTGK  
NLE1 AA AVADEAVAR  
MAN2B1 LIQLVNAQQAK NLCWDVLCVDQP VVEDPR YYRTNHIVMTMGSD FQYENANMWFK  
BCAT2 PVLIGNEPSLGV SQPR  
CRYZ VLGTAGTEEGQK AYGLKVLGTAGTEEGQKIVLQNGAHEVFNHR  
PLEC EQLQQEQALLEEIER YSELTTLTSQYIK AGVAAPATQVVQVTLQSVQR  
AHNAK VDIDVPDVGVQGPDWHLK GEGPEVDVTLPKADIDISGPSVDVDPDVNIEGPD AK VSVGATDLSLEAS  
MESD RPSAPVDFSR  
BRD3 KADTTTPTTSVITASR  
DYNC1LI1 YGAALIYTSVK FCLRYGAALIYTSVK  
CPT1A KLDQEEIKPIR  
HLA-A APWIEQEGPEY WDEETGK VKAHSQTDR  
CS IYQNL YR

NUP210 NPLLDLAAYDQEGR NPLLDLAAYDQEGR  
 MRM3 VVFPSEEVVEQK  
 ARL2 EALELDSIR  
 QPRT YGLLVGGAVSHR LVEKYGLLVGGAVSHR  
 GSTO1 SQNKEDYDGLKEEFR EDYDGLKEEFR EDYDGLKEEFRK  
 HOMER3 AAQLLDVR LFELSELR  
 H6PD LFGSPLSDYYAYSPVQER  
 TAPBPL NEVLWHPTLNLPLSPQGTVR TAAWFMANVQVSGGGPSISLVMKTPR  
 TRAP1 DVGEWQHHEFYR ALLLWGCR  
 PDPR LYHQLEQETGIQTGYTR MADYSNKLYHQLEQETGIQTGYTR  
 OPA1 ALPNSEDLVK LLENGTR  
 GPX1 LAAAAAQSVYAFSAR  
 MCM7 RFELYFQGPSSSKPR FELYFQGPSSSKPR  
 MYO18A QNPATQNVPR  
 TAP2 LAQLQEGQDLYSR TVLVIAHRLQAVQRAHQILVLQEGK LAQLQEGQDLYSRLVQQR  
 PLEC AGVAAPATQVVQVTLQSVQR YSELTTLTSQYIK EQLQQEQALLEEIER VQSGSESVIQEYVDLRT  
 NUP210 NPLLDLAAYDQEGR  
 AHNAK VDIDVPDVGVQGPDWHLK VEGDLKGPEVDIRGPK  
 GSTO1 SQNKEDYDGLKEEFR VPSLVGSFIRSQNKEDYDGLK  
 GBE1 LFAYSSWEVLR  
 CRYZ VLGTAGTEEGQK  
 NAT10 TLHEVSLQESIR  
 TLN1 LLSDLLPPSTGTFQEAQSR RLLSDLLPPSTGTFQEAQSR  
 DYNC1LI1 FSLDAISLK  
 PDPR LYHQLEQETGIQTGYTR  
 MANBA PVGGQVIAIPK  
 HLA-A APWIEQEGPEYWDEETGK APWIEQEGPEYWDEETGKVK  
 DUSP23 LRPSSIETYEQEK LAGLALPRLPAHYQFLLDVGVRRHLVSLTER  
 NOL9 LLQAQAAGVDWR WGSCRSTWLRVR  
 CAVIN2 EPVSGAVEGKEELPDENK  
 IQGAP2 RQTFIDNTDSVVK QTFIDNTDSVVK VLWLDEIQQAVDEANVDEDRAK VLWLDEIQQAVDEANVDEDI  
 PML VVIQPEALFSIYSK  
 NCF2 LYEPVVIPVGR LSYWPRDSNELVPLSEDSMK  
 RRBP1 EHTLHLEAELEK GELESSDQVREHTLHLEAELEKHMMAAASAECQNYAK  
 NMI EHLPDEFIKDEQNK  
 TAP2 LAQLQEGQDLYSR LAQLQEGQDLYSRLVQQRLMD  
 AHNAK VDIDVPDVGVQGPDWHLK VEGDLKGPEVDIRGPK  
 CPVL QVGFHQVIIR  
 MACF1 TLLPEDTQK TLLPEDTQKLDNFLGEVRDK  
 MYO1G DKDGFAGVLFSSHVR IFLQTLDTTHR IFLQTLDTTHRHHLHYTSR  
 CTSC VGTASENVVYVNTAHLK  
 RNASEH2A LQSDTDYGGSGYPNDPK  
 DIDO1 LQQEADVPAYPK TAPPGSTVGK SEEKAAATAASKK  
 GLRX3 HASSGSFLSSANEHLKEDLNLR HASSGSFLSSANEHLK  
 HOMER3 AAQLLDVR  
 TLN1 LLSDLLPPSTGTFQEAQSR  
 GNPAT GVFADEFIFLPGNTLK

|          |                                                                          |
|----------|--------------------------------------------------------------------------|
| HLA-DPB1 | HNYELDEAVTLQR ATPENYVYQLR                                                |
| FAN1     | LQLIHDASEESLR                                                            |
| CPPED1   | LADKFIHAGVR                                                              |
| PLEC     | YSELTTLTSQYIK LAQGHTTVDELAQR GANVIAGVWLEEVGQK                            |
| CTSW     | VAGAISPIKDQK VAGAISPIK                                                   |
| CLEC3B   | GGTLSTPQTGSENDALYEYLR                                                    |
| NSFL1C   | ASSSILINESEPTTNIQIR                                                      |
| HOMER3   | LFELSELR AAQLLDVR                                                        |
| SULT1A1  | SLPEETVDFMVQHTSFK                                                        |
| SUCLG2   | LEGANVQEAQK                                                              |
| TRAF3IP3 | FLENEHQELQAK VQQLQEAAGWTT                                                |
| ITGAM    | DHVFQVNNYEALK QNTGTWESNANVK                                              |
| GLO1     | KATLELTHNWGTEDDATQSYHNGNSDPR ATLELTHNWGTEDDATQSYHNGNSDPR                 |
| SRPRB    | LADGGGAGGTFQPYLDTLR                                                      |
| PITRM1   | EAYFSVGLQGIVEKDIETVR EAYFSVGLQGIVEK                                      |
| TLN1     | LLSDLLPPSTGTFQEAQSR                                                      |
| MGMT     | LGRPGLGGSSGLAGAWLK                                                       |
| HLA-DRB5 | HNYGVGESFTVQR GIYNQEENVR GHSGLHPTGLVS VTVYPAR YECHFFNGTERVR FLHRGIYNQEEN |
| ARHGDI   | APNVLVTR                                                                 |
| WASHC4   | LGITPEGQSYLDQFR                                                          |
| MRPL10   | IFPNQVLKPFLEDSK IFPNQVLK                                                 |
| CPVL     | QVGDFHQVIIR                                                              |
| NUP210   | NPLDLAAYDQEGR NPLDLAAYDQEGRR LTLVPVYTSPQLDMSCPLLQKNK QGKITELSMPSDQYEL    |
| TKFC     | ASYISSAQLEQPDGAVAAAAAILR                                                 |
| CPT1A    | AGNTIHAILLYR                                                             |
| CLIC1    | AEQPQVELFVK AEQPQVELFVKAGSDGAK                                           |
| ZNF22    | SFGQSSTLFQHQBK CTECEKSFQGSSTLFQHQBKIHTGK                                 |
| IQGAP2   | QTFIDNTDSVVK VLWLDEIQQAVDEANVDEDR VLWLDEIQQAVDEANVDEDR                   |
| ABCE1    | AIIKPQDQVQIPK                                                            |
| SDR39U1  | VLVGGGTGFIGTALTQLLNAR                                                    |
| AHNAK    | VDIDVPDVGVQPDWHLK VSVGATDLSLEASEGSIKLPK                                  |
| PLIN3    | AQEALLQLSQALSLMETVK QRAQEALLQLSQALSLMETVKQGVDQK                          |
| PLEC     | YSELTTLTSQYIK EQLQQEQALLEEIER AGVAAPATQVVQVTLQSVQR                       |

EGR GPTVGGGLPGTGVQGLEGNLQMPGIK VSMPGVDLNLKGP K GPEVDIDVPDQPDVQPDWHLK GPEVDIDVPI

JVDVQGPDWHLKMPK

| Variant                                      | Number of patient | Gene           |
|----------------------------------------------|-------------------|----------------|
| II_726022@Ala112Thr                          | 5                 | RPL13          |
| II_582891@Ser583GlySer557Pro[Ser822SerAla67] | 2                 | ESYT2          |
| IP_228485@Val37Met                           | 1                 | MOAP1          |
| II_597058@Ser14TrpLeu17ValThr37AlaSer50ThrG  | 1                 | HLA-H          |
| II_597058@Ser14TrpLeu17ValThr37AlaSer50ThrG  | 1                 | HLA-H          |
| II_726022@Ala112Thr                          | 1                 | RPL13          |
| IP_177302@Val25Ala                           | 1                 | ASB6           |
| II_597058@Ser14TrpLeu17ValThr37AlaSer50ThrG  | 1                 | HLA-H          |
| II_677849@Lys89Arg                           | 1                 | ADAR           |
| II_730346@Val120Met                          | 1                 | SULT1A1        |
| II_630163@Val37Ile                           | 1                 | GFM1           |
| II_726022@Pro100Ala                          | 1                 | RPL13          |
| II_721332@Ala92Asp[Pro105Pro]                | 1                 | GLOD4          |
| II_740517@Thr171Ile                          | 1                 | ETFA           |
| II_3437680@Val104Ala                         | 1                 | ASAH1          |
| II_597058@Ser14TrpLeu17ValThr37AlaSer50ThrG  | 1                 | HLA-H          |
| IP_3428277@Glu29Val                          | 1                 | GOLGA8IP       |
| IP_160788@Val79Ala                           | 1                 | LOC100506302,1 |
| IP_158738@Ala46fs[Thr35Thr]                  | 1                 | GIMAP6         |
| II_726022@Ala112Thr                          | 1                 | RPL13          |
| II_299453@Pro119Leu                          | 1                 | RBM3           |
| II_597058@Ser14TrpLeu17ValThr37AlaSer50ThrG  | 1                 | HLA-H          |
| II_726022@Ala112Thr[Arg31Arg]                | 1                 | RPL13          |
| II_758045@Ala342Glu                          | 1                 | SPART          |
| II_295391@Ala42Gly                           | 1                 | MCAT           |
| II_597058@Ser14TrpLeu17ValThr37AlaSer50ThrG  | 1                 | HLA-H          |
| II_3423177@Val175Ala112Val                   | 1                 | ASAH1          |
| IP_213716@His22Arg                           | 1                 | HAL            |
| II_597058@Ser14TrpLeu17ValThr37AlaSer50ThrG  | 1                 | HLA-H          |
| IP_261590@Pro15Leu                           | 1                 | MAFG           |
| II_299453@Pro119Leu                          | 1                 | RBM3           |
| II_597058@Ser14TrpLeu17ValThr37AlaSer50ThrG  | 1                 | HLA-H          |
| II_726022@Ala112Thr                          | 1                 | RPL13          |
| IP_591885@Asn91SerPhe88Tyr[Ser36Ser]         | 1                 | GAPDHP63       |
| IP_246386@Gln24Lys[Ala7Ala]                  | 1                 | AP1G1          |
| II_569582@Ala7Gly                            | 1                 | NIPSNAP3B      |
| IP_241298@Met25Val                           | 1                 | RMI2           |
| II_597058@Ser14TrpLeu17ValThr37AlaSer50ThrG  | 1                 | HLA-H          |
| IP_272869@Gly28SerLys20Gln[Val10Val]         | 1                 | ZNF708         |
| II_766937@Pro697Ser[Leu693Leu]               | 1                 | CAND1          |
| IP_213716@His22Arg                           | 1                 | HAL            |
| II_726022@Ala112Thr[Ala47Ala]                | 1                 | RPL13          |
| II_3437162@Pro174SerAsp120Asn                | 1                 | MOGS           |
| II_596695@Ser8ProGlu55AlaLeu59GlnAspGlyThr6  | 1                 | HLA-A          |
| IP_280353@Thr62AlaPhe74fsArg22Gly[Val58Val]  | 1                 | ZNF587         |
| II_597058@Ser14TrpLeu17ValThr37AlaSer50ThrG  | 1                 | HLA-H          |

**Identified Peptides**

STESLQTNVQR  
FQLGNSGPNSTIK  
PFVVSMP  
FSDATSPR YFYTAMSR YFYTAMSRPGR FSDATSPREEPR  
FSDATSPR FSDATSPREEPR FITVGYVDDTQFVR  
STESLQTNVQR LSGRPGARGQ  
ASTAWRSHFIIFFFR  
YFYTAMSRPGR YFYTAMSR FIAVGYVDDTQFVRFSDDDASPR GEPRIAVGYVDDTQFVRFSDDDASPR EEPRAPI  
NTNSVPETAPAAIPETR  
SLPEETVDFMVQHTSFK  
GIIDLIEER  
TIGISVDAR  
LLDDAMADDKSDEWFAK LLDDAMADDKSDEWFAKHNK  
GISFDAAATSGGSASSEK  
DAMWIGFLTR  
GYDQYAYDGKDYIALNEDLR EGPKYWDR FITVGYVDDTQFVRFSDDDASPREPR  
TVLAGLV  
ISWAWWHMHVIPATWEAEAQESLELR  
PVSFTSV  
STESLQTNVQR GDSSVSTRLSGR  
VFGAALK VFGAALKHLIL  
FITVGYVDDTQFVR LLRGYDQYAYDGKDYIALNEDLR YLENGKETLQRADPPQDTR  
STESLQTNVQR  
LQANWNREEEENEQIPGR QMSDLRLQANWNREEEENEQIPGR  
KPLVSVYSNVHGHR  
GYDQYAYDGKDYIALNEDLR FITVGYVDDTQFVR LLRGYDQYAYDGKDYIALNEDLR APWIEQEGPKYWDR YYNQ  
DAMWIGFLTR MLKVIVNSLK  
SLILLG EPLVPVETLPR  
GYDQYAYDGKDYIALNEDLR GEPHFITVGYVDDTQFVRFSDDDASPREPR KWEAVHACVAEQR  
VVLPGRVGGGPLGTALSSLSLPHSESLGGLHQCR  
VFGAALK  
YFSTSVSR YFSTSVSRPGR FITVGYVDDTQFVR NTQICKAHSQTYRENLR SHSMRYFSTSVSRPGR  
STESLQTNVQR RNKSTESLQTNVQR  
LISWYDNEYGYSNR  
VRPTLLK  
PGGGLWGDAFER  
DVVSLV  
GYDQYAYDGKDYIALNEDLR EGPKYWDR APWMEREGPK YFYTAMSRPGR YYNQSEAGSHTMQVMYGCDVGP  
VWMSISCTQEVTR  
AVAALLTISEAEK  
SLILLG KEPLVPVETLPRSLILLG  
STESLQTNVQR  
FISGHTSELGNFR LNSWFQHRPPGASPER  
WASVVVPSGQEQR VAEQQRAYLEGR SWTAADMAAQITQRK AYLEGRCVEWLR  
YNSFLGQSLTSPR  
FSDATSPR TALRYYNQSEAGSHTIQR YFYTAMSRPGRGEP



.SEAGSHTMQVMYGCDVGSDWR
